# Supplementary material for: Bipyridine Ruthenium(II) Complexes with Halogen-Substituted Salicylates: Synthesis, Crystal Structure, and Biological Activity
Source: MDPI journal article supplement (doi:10.3390/molecules28124609), 2023-06-07
Supplement: s1 [file s1]

## Supplementary material

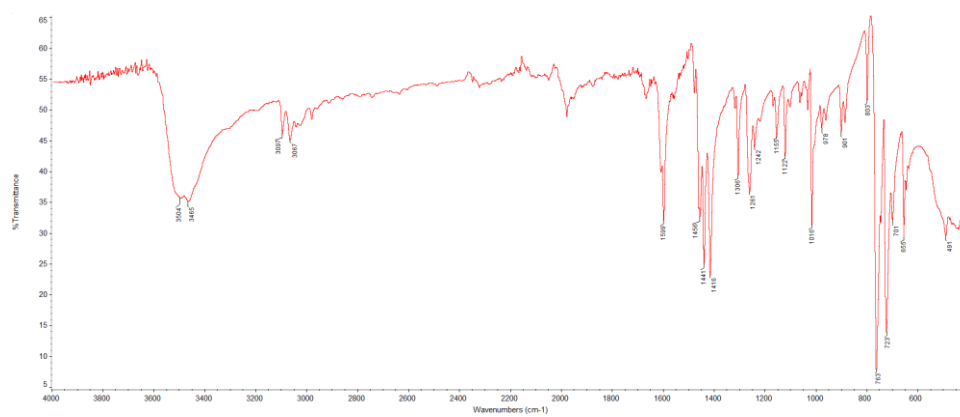

**Figure S1** FTIR spectrum of precursor complex [Ru(bipy)<sub>2</sub>Cl<sub>2</sub>]

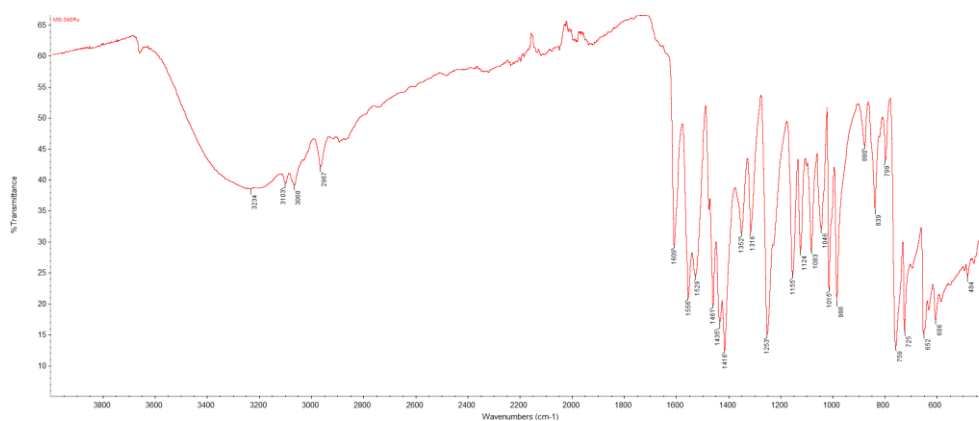

**Figure S2** FTIR spectrum of complex  $[\text{Ru}(\text{bipy})_2(4\text{-F-Sal})]\cdot 3\text{H}_2\text{O}\cdot \text{EtOH}$  (1:3H<sub>2</sub>O·EtOH)

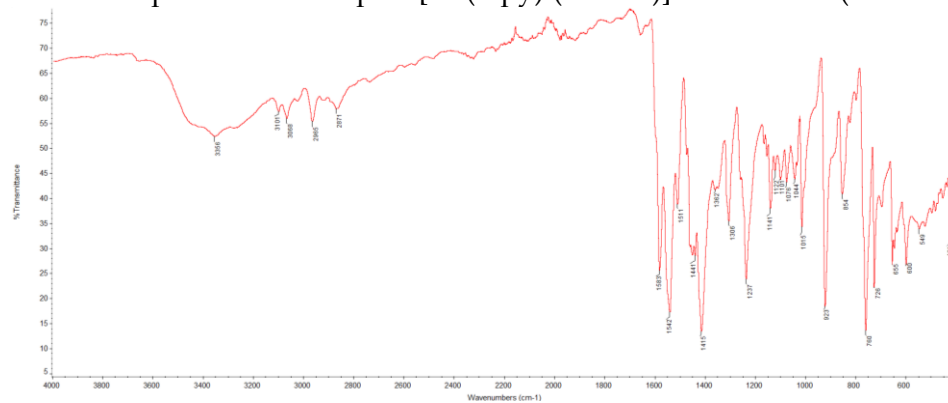

**Figure S3** FTIR spectrum of complex  $[\text{Ru}(\text{bipy})_2(4\text{-Cl-Sal})]\cdot 2.6\text{H}_2\text{O}\cdot 2\text{EtOH}$  (2:2.6H<sub>2</sub>O·2EtOH)

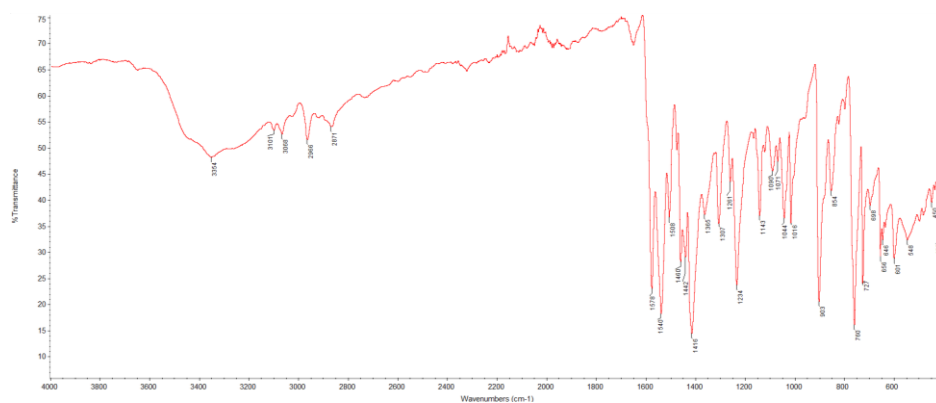

**Figure S4** FTIR spectrum of complex  $[\text{Ru}(\text{bipy})_2(4\text{-Br-Sal})]\cdot 6\text{H}_2\text{O}$  (3:6H<sub>2</sub>O)

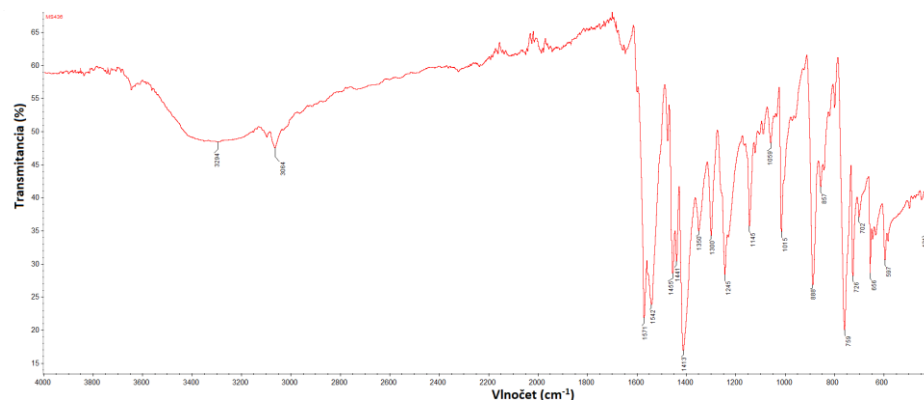

**Figure S5** FTIR spectrum of complex  $[\text{Ru}(\text{bipy})_2(4\text{-I-Sal})]\cdot 3\text{H}_2\text{O}$  (4:3H<sub>2</sub>O)

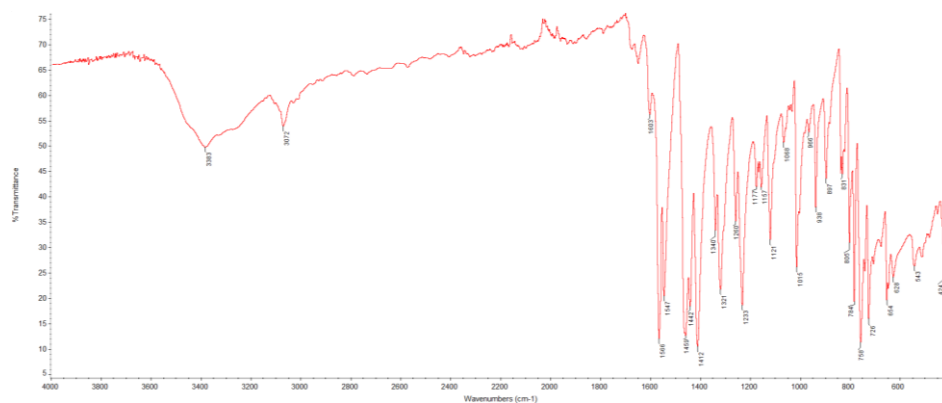

**Figure S6** FTIR spectrum of complex  $[\text{Ru}(\text{bipy})_2(5\text{-F-Sal})] \cdot 1.55\text{H}_2\text{O}$  (5·1.55H<sub>2</sub>O)

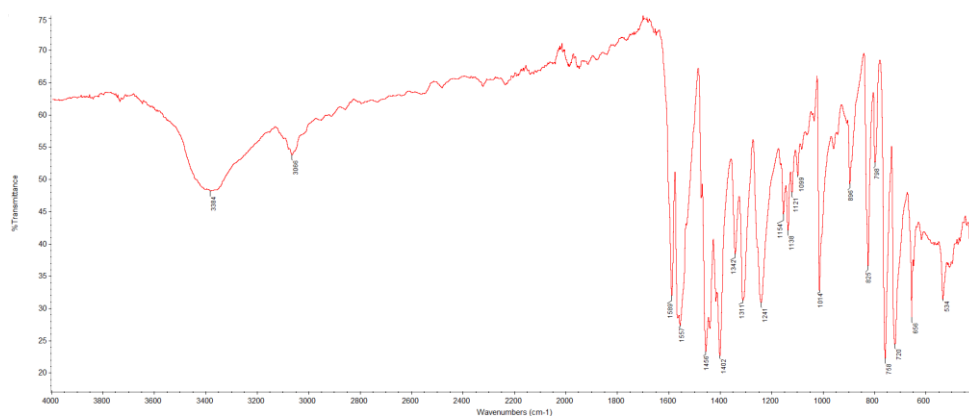

**Figure S7** FTIR spectrum of complex  $[\text{Ru}(\text{bipy})_2(5\text{-Cl-Sal})]$  (6)

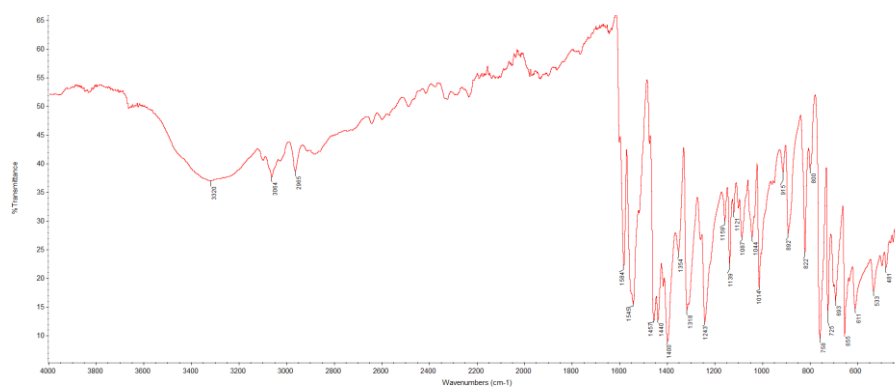

**Figure S8** FTIR spectrum of complex  $[\text{Ru}(\text{bipy})_2(5\text{-Br-Sal})]$  (7)

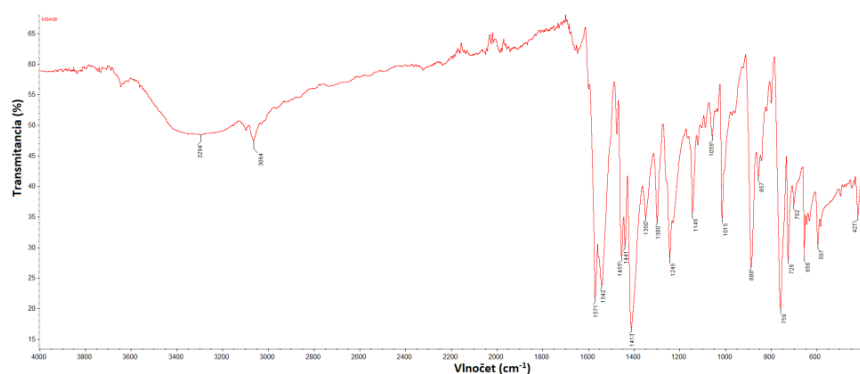

**Figure S9** FTIR spectrum of complex  $[\text{Ru}(\text{bipy})_2(5\text{-I-Sal})]\cdot 4\text{H}_2\text{O}$  ( $8\cdot 4\text{H}_2\text{O}$ )

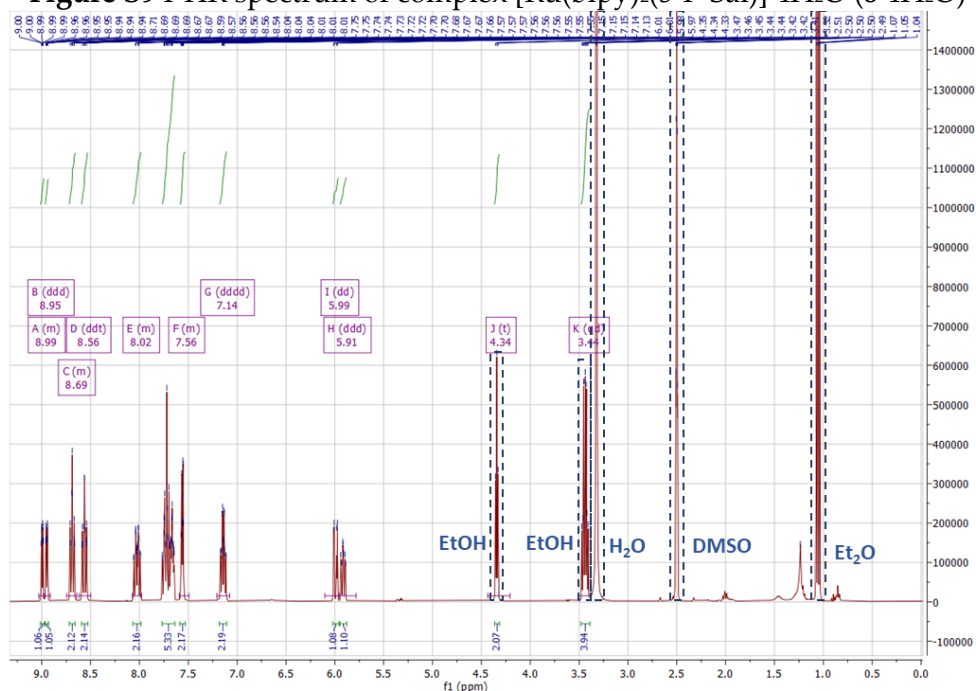

**Figure S10**  $^1\text{H}$  NMR spectrum of complex  $[\text{Ru}(\text{bipy})_2(4\text{-F-Sal})]$  (**1**) with marked signals for solvents and impurities (blue dashed line).

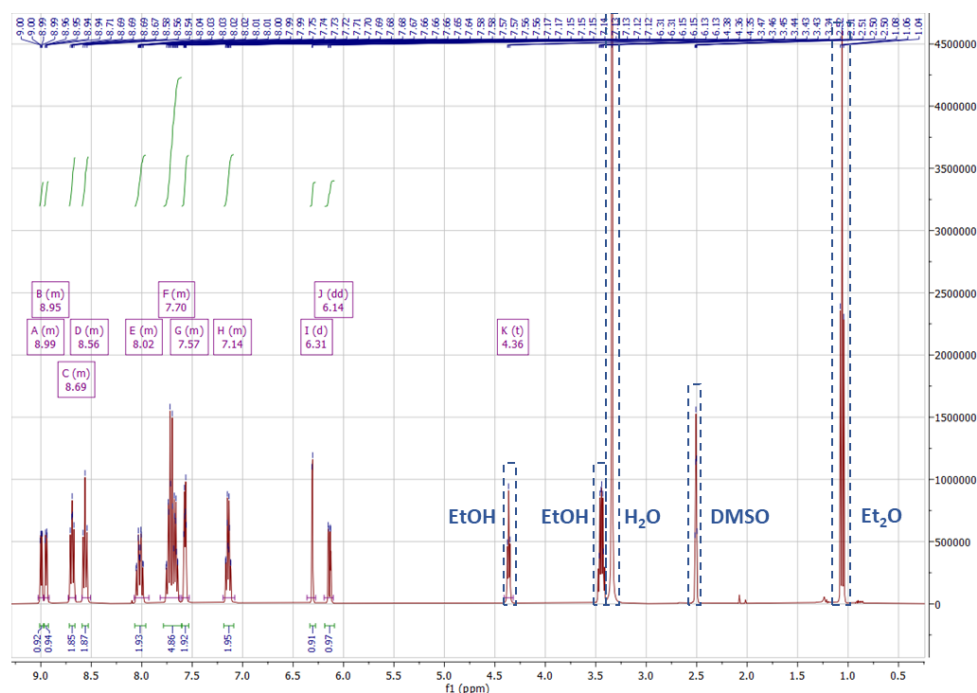

**Figure S11** <sup>1</sup>H NMR spectrum of complex [Ru(bipy)<sub>2</sub>(4-Cl-Sal)] (2) with marked signals for solvents and impurities (blue dashed line).

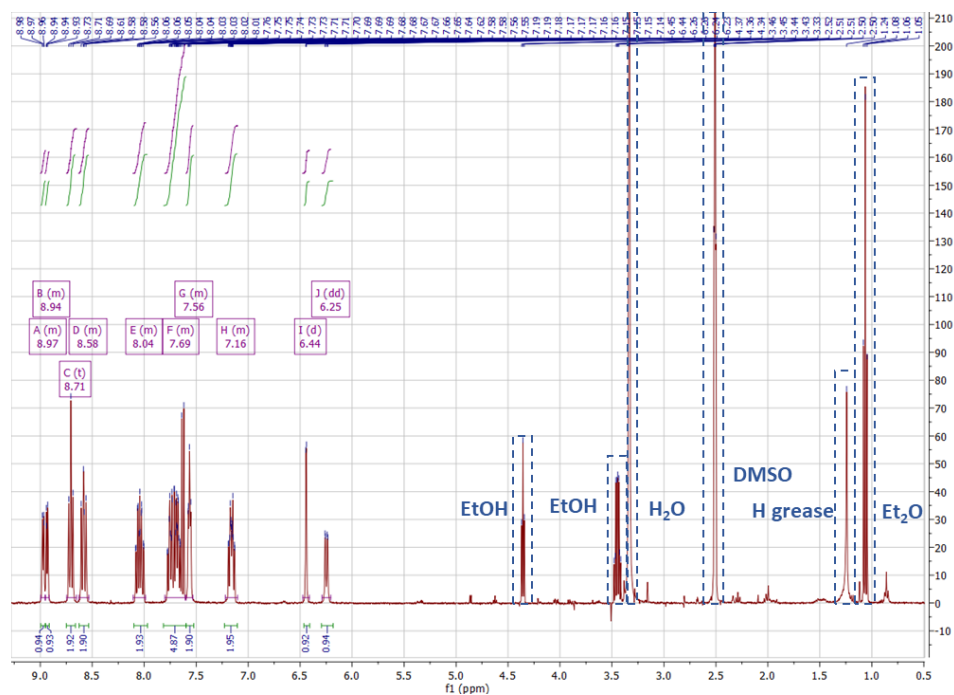

**Figure S12** <sup>1</sup>H NMR spectrum of complex [Ru(bipy)<sub>2</sub>(4-Br-Sal)] (3) with marked signals for solvents and impurities (blue dashed line).

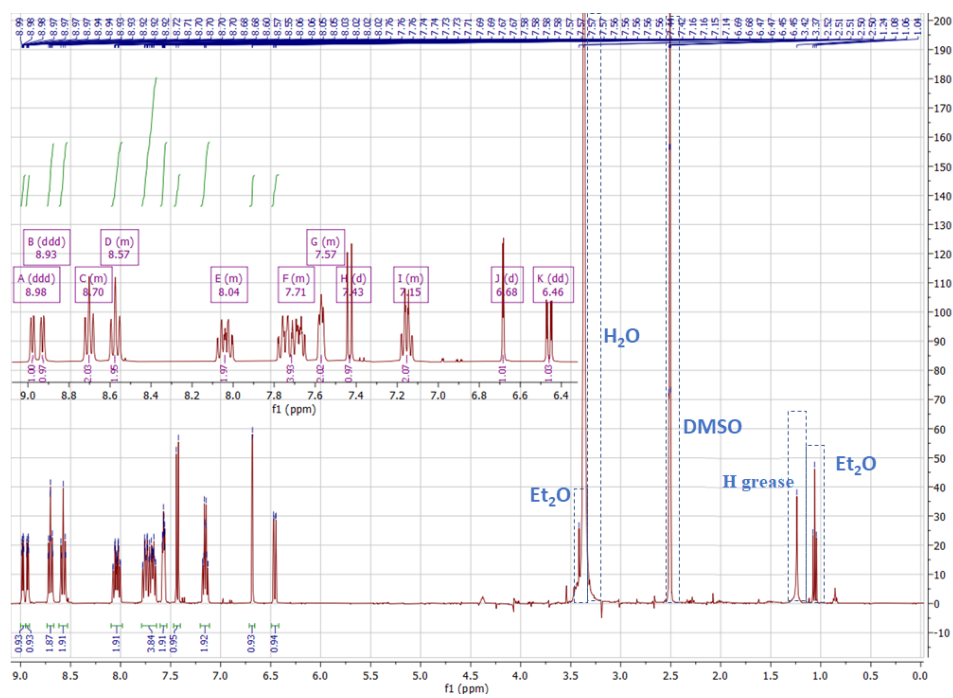

**Figure S13**  $^1\text{H}$  NMR spectrum of complex  $[\text{Ru}(\text{bipy})_2(4\text{-I-Sal})]$  (4) with marked signals for solvents and impurities (blue dashed line).

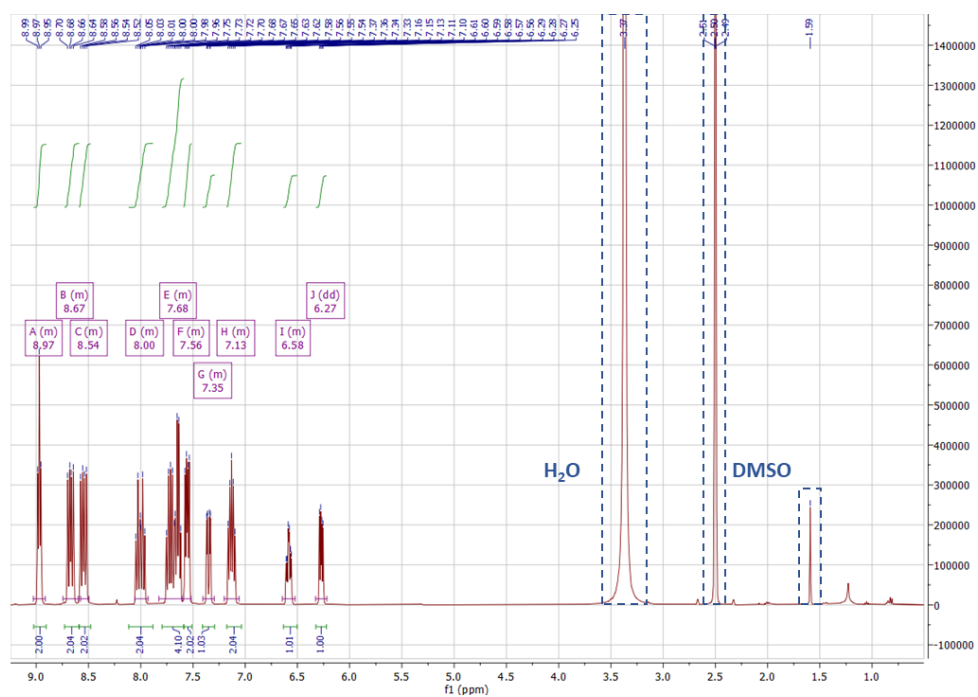

**Figure S14**  $^1\text{H}$  NMR spectrum of complex  $[\text{Ru}(\text{bipy})_2(5\text{-F-Sal})]$  (**5**) with marked signals for solvents and impurities (blue dashed line).

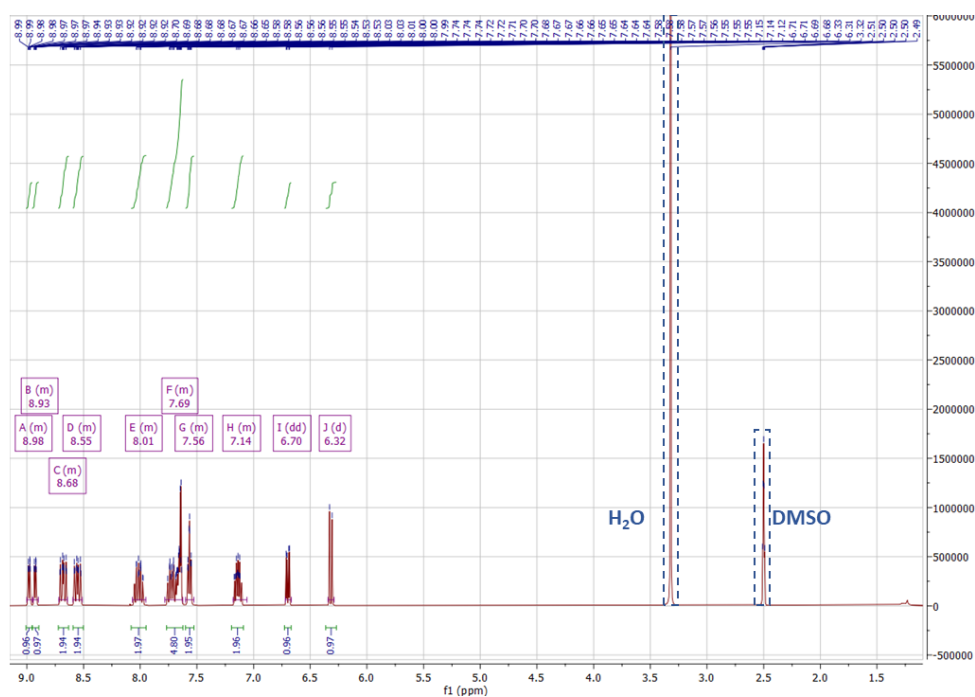

**Figure S15**  $^1\text{H}$  NMR spectrum of complex  $[\text{Ru}(\text{bipy})_2(5\text{-Cl-Sal})]$  (**6**) with marked signals for solvents and impurities (blue dashed line).

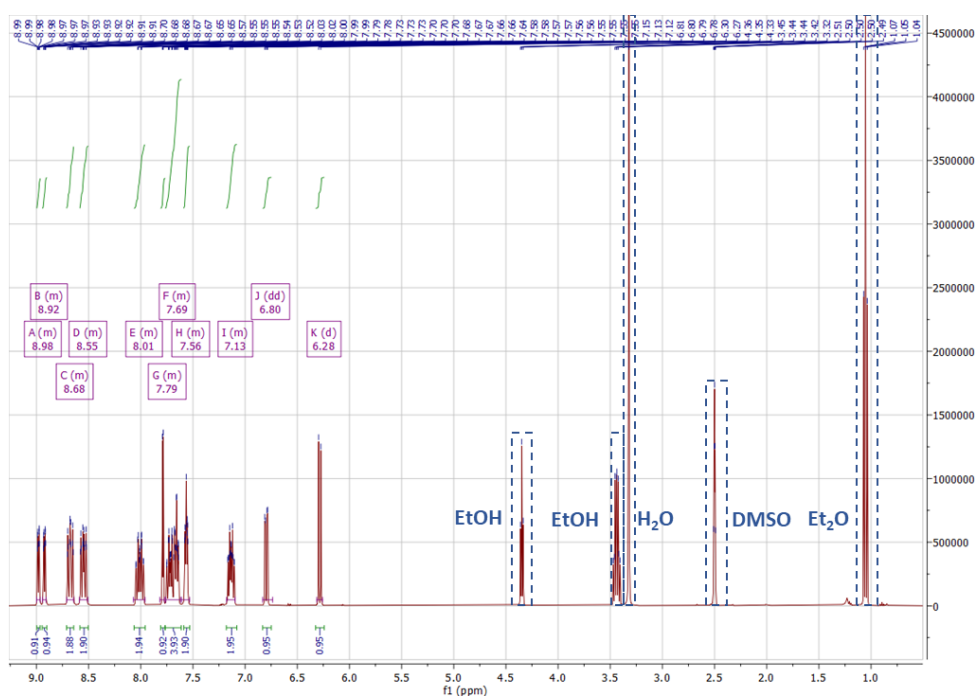

**Figure S16**  $^1\text{H}$  NMR spectrum of complex  $[\text{Ru}(\text{bipy})_2(5\text{-Br-Sal})]$  (**7**) with marked signals for solvents and impurities (blue dashed line).

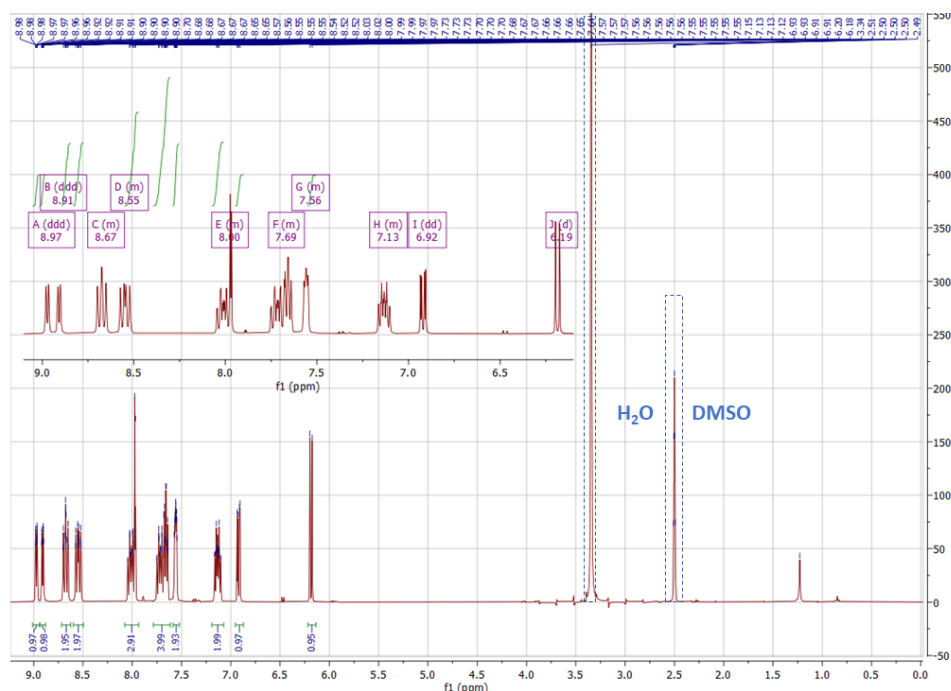

**Figure S17**  $^1\text{H}$  NMR spectrum of complex  $[\text{Ru}(\text{bipy})_2(5\text{-I-Sal})]$  (8) with marked signals for solvents and impurities (blue dashed line).

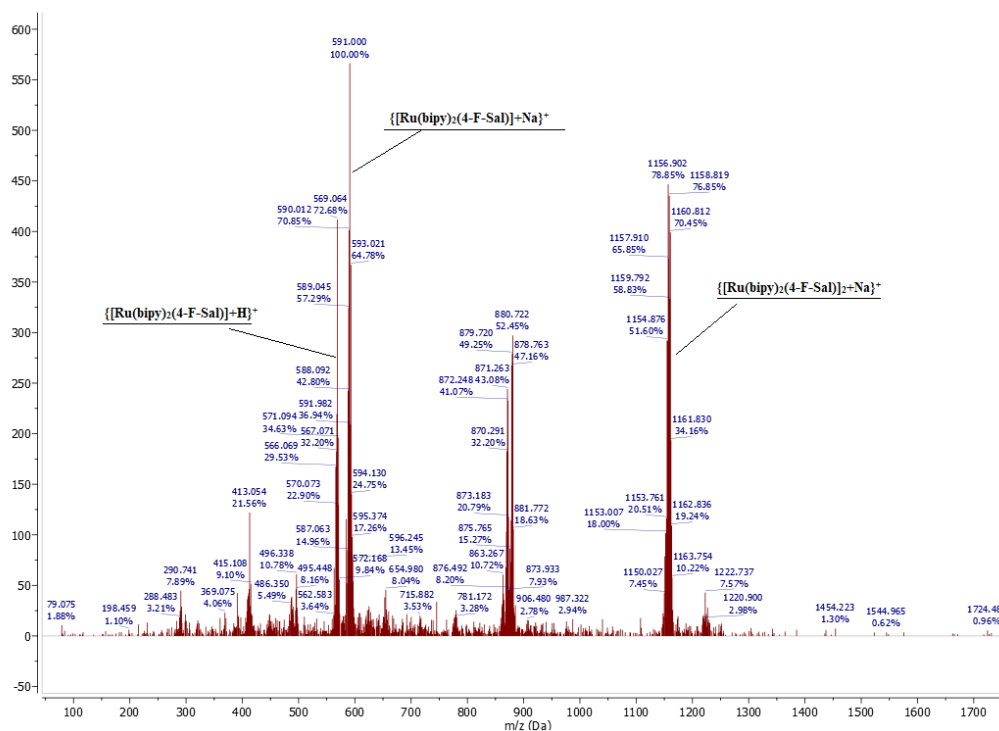



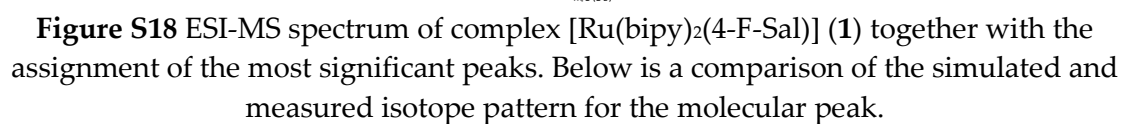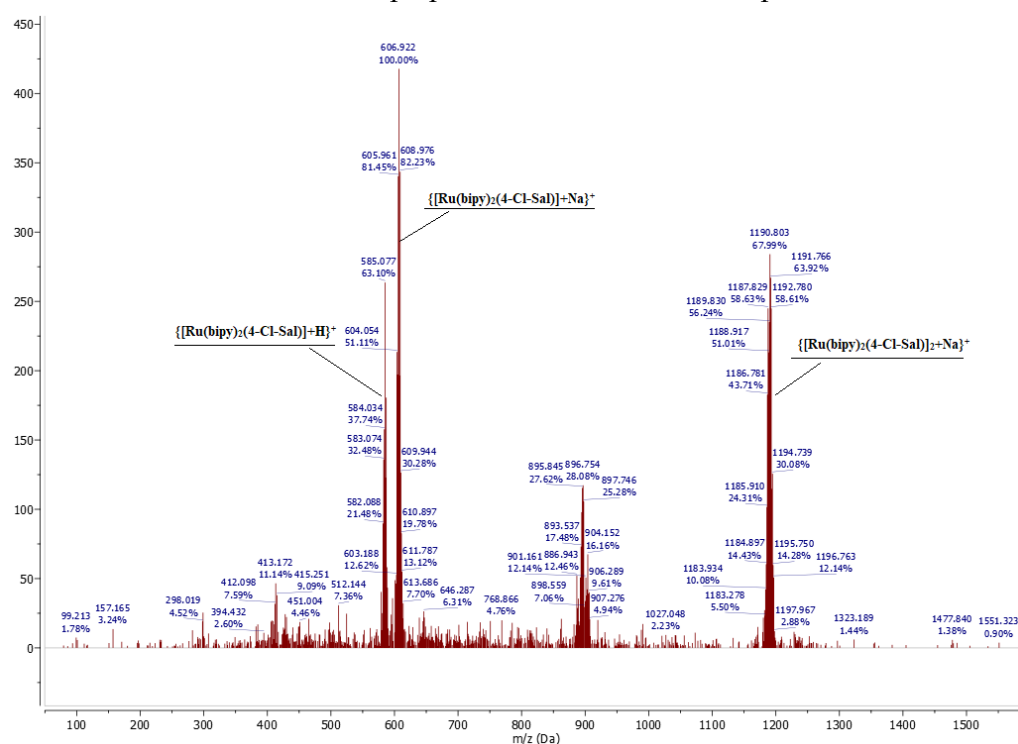

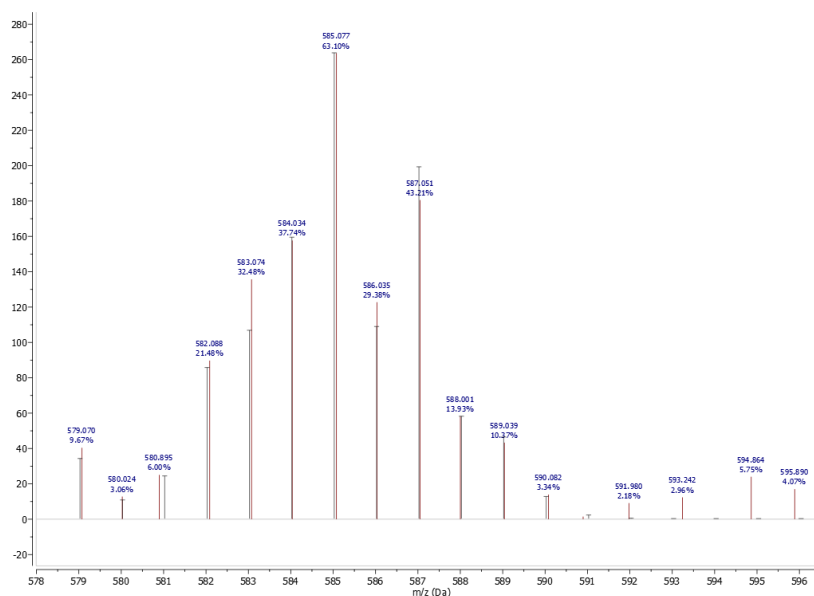

**Figure S19** ESI-MS spectrum of complex  $[\text{Ru}(\text{bipy})_2(4\text{-Cl-Sal})]$  (**2**) together with the assignment of the most significant peaks. Below is a comparison of the simulated and measured isotope pattern for the molecular peak.

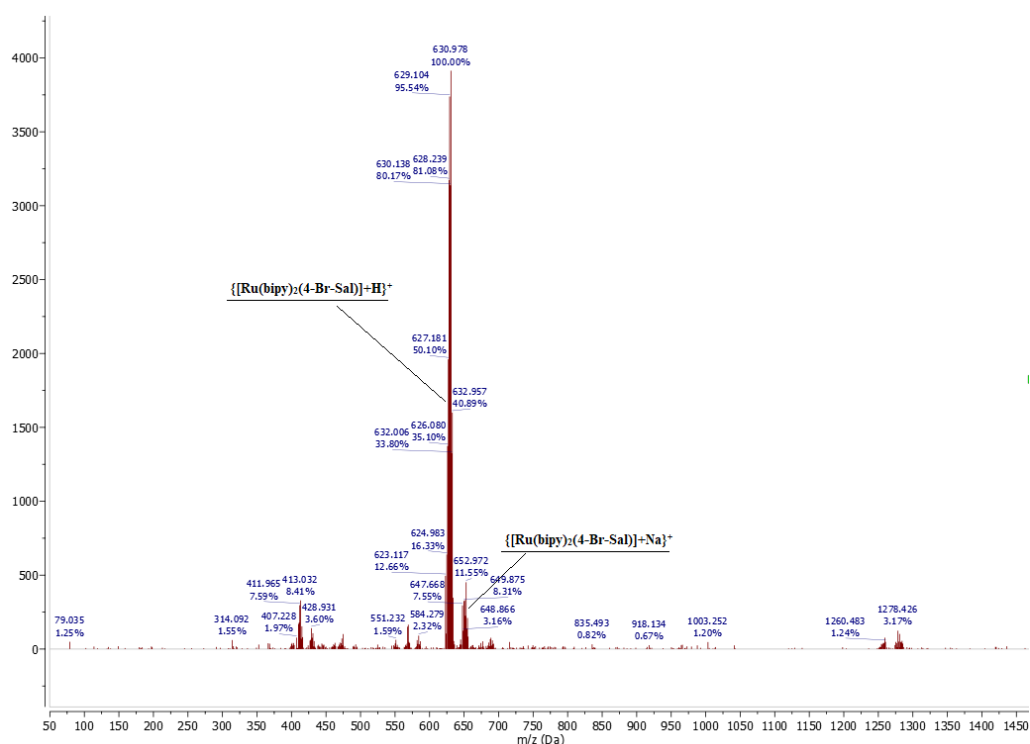

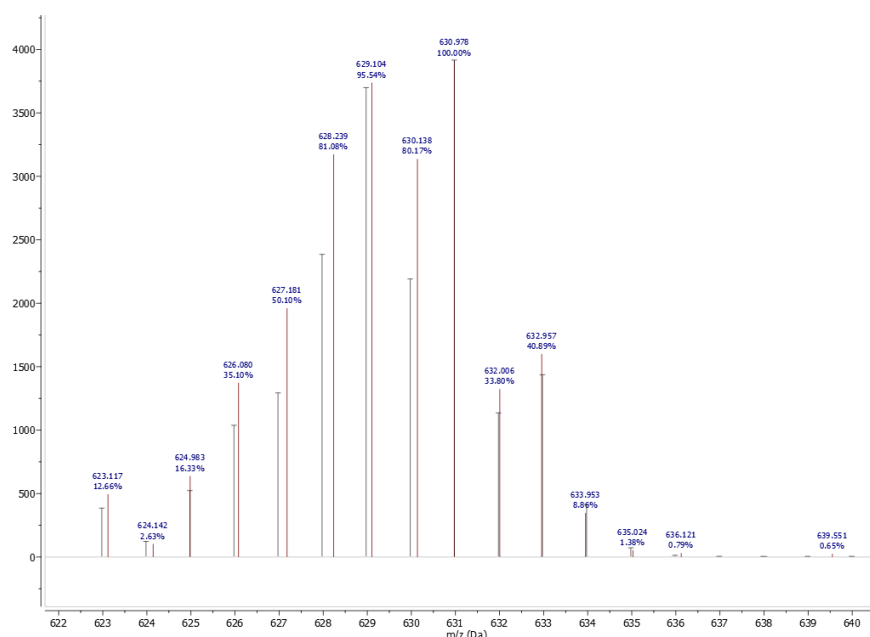

**Figure S20** ESI-MS spectrum of complex  $[\text{Ru}(\text{bipy})_2(4\text{-Br-Sal})]$  (**3**) together with the assignment of the most significant peaks. Below is a comparison of the simulated and measured isotope pattern for the molecular peak.

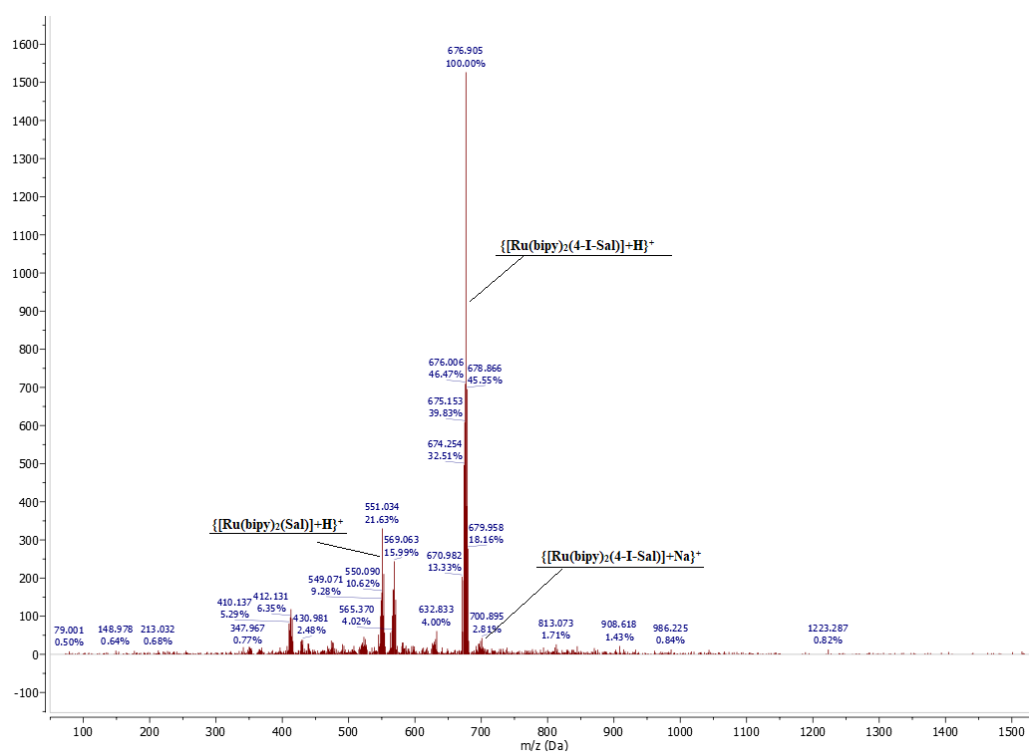

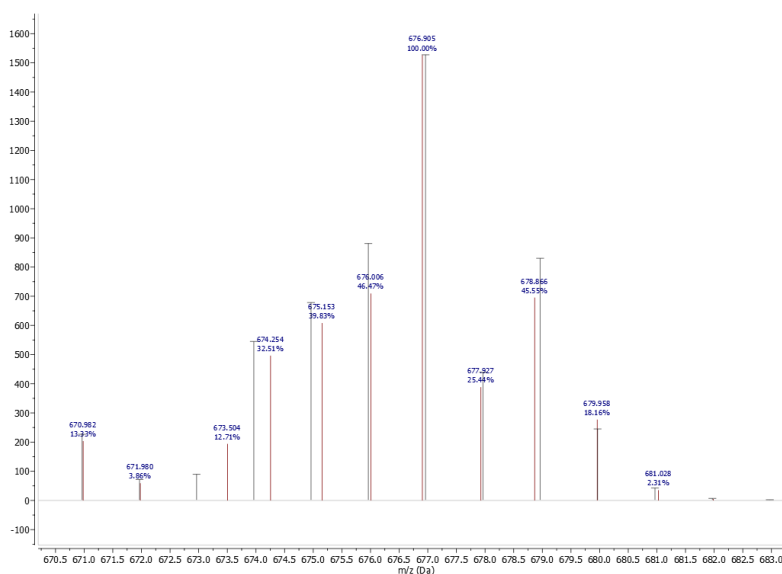

**Figure S21** ESI-MS spectrum of complex  $[\text{Ru}(\text{bipy})_2(4\text{-I-Sal})]$  (**4**) together with the assignment of the most significant peaks. Below is a comparison of the simulated and measured isotope pattern for the molecular peak.

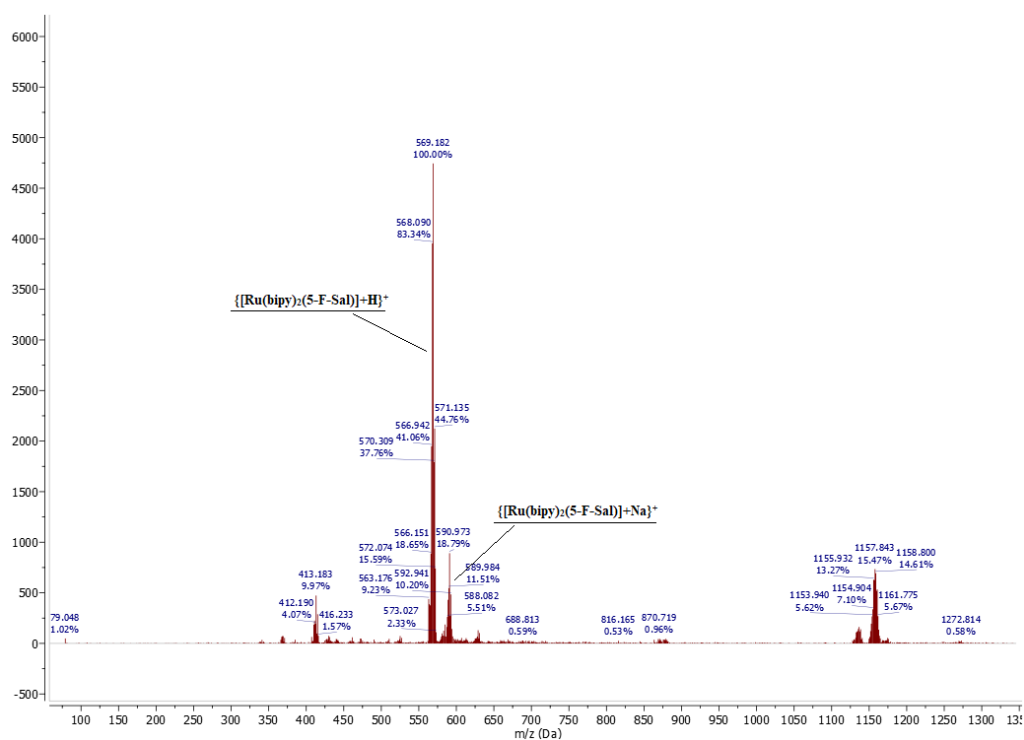

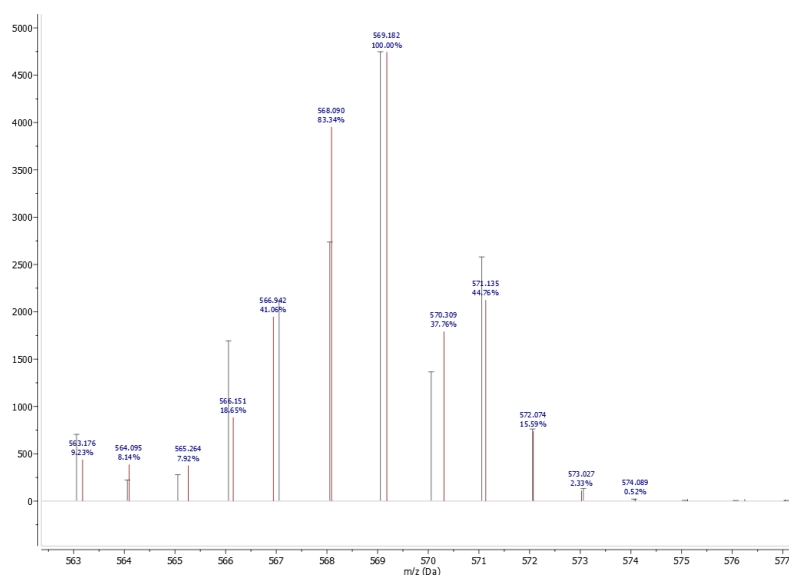

**Figure S22** ESI-MS spectrum of complex  $[\text{Ru}(\text{bipy})_2(5\text{-F-Sal})]$  (**5**) together with the assignment of the most significant peaks. Below is a comparison of the simulated and measured isotope pattern for the molecular peak.

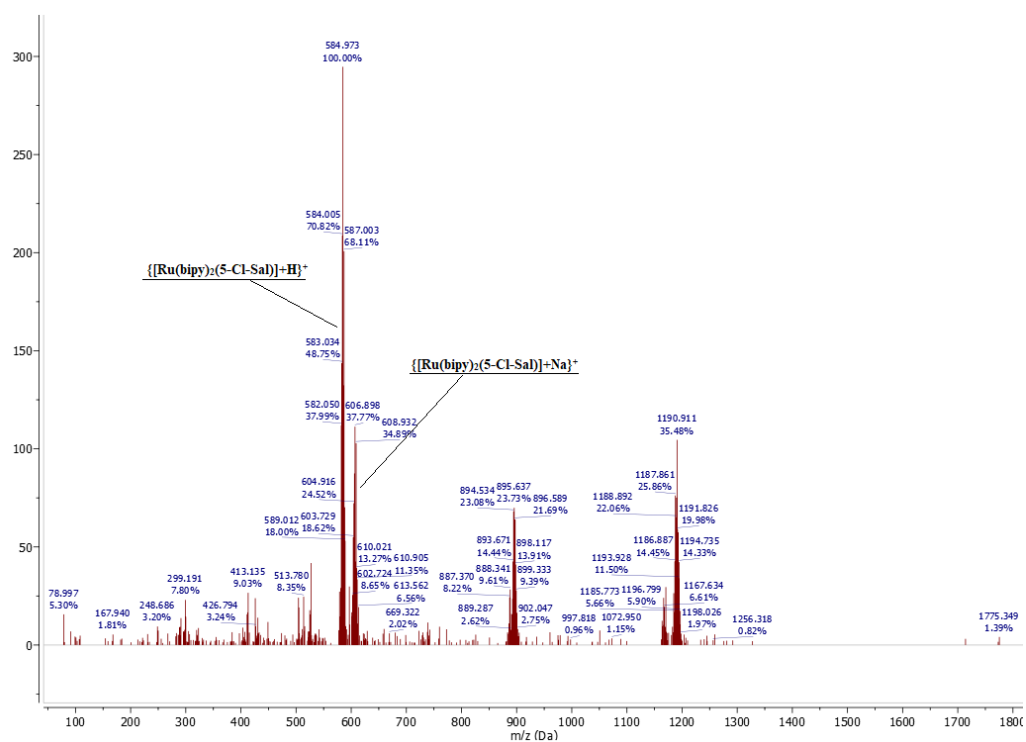

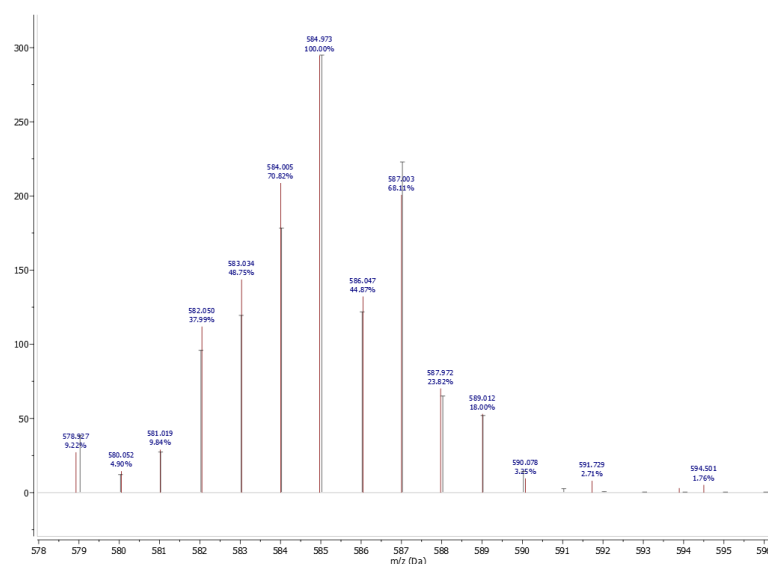

**Figure S23** ESI-MS spectrum of complex  $[\text{Ru}(\text{bipy})_2(5\text{-Cl-Sal})]$  (**6**) together with the assignment of the most significant peaks. Below is a comparison of the simulated and measured isotope pattern for the molecular peak.

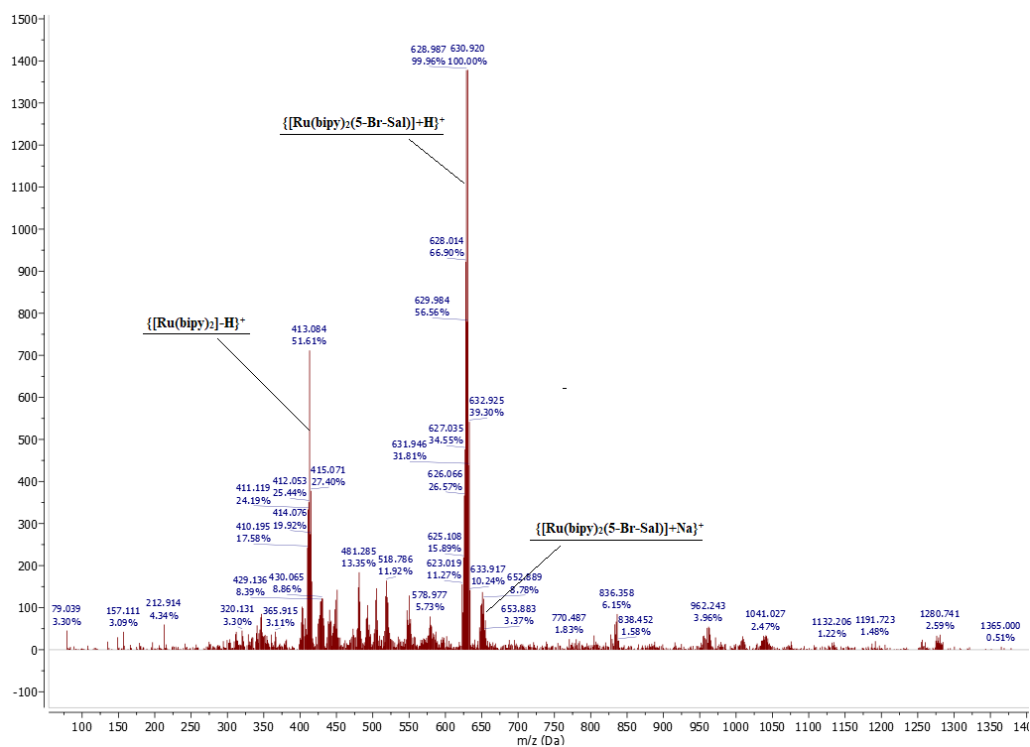

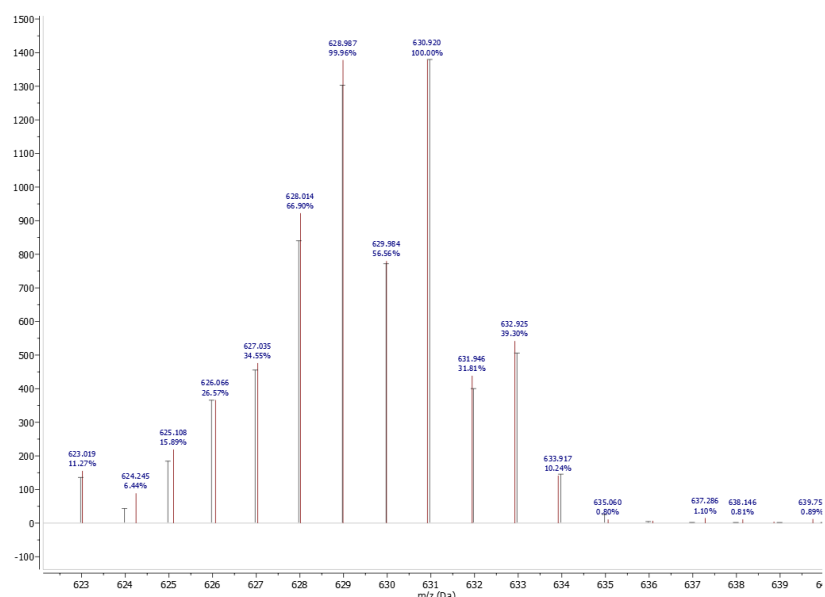

**Figure S24** ESI-MS spectrum of complex  $[\text{Ru}(\text{bipy})_2(5\text{-Br-Sal})]$  (**7**) together with the assignment of the most significant peaks. Below is a comparison of the simulated and measured isotope pattern for the molecular peak.

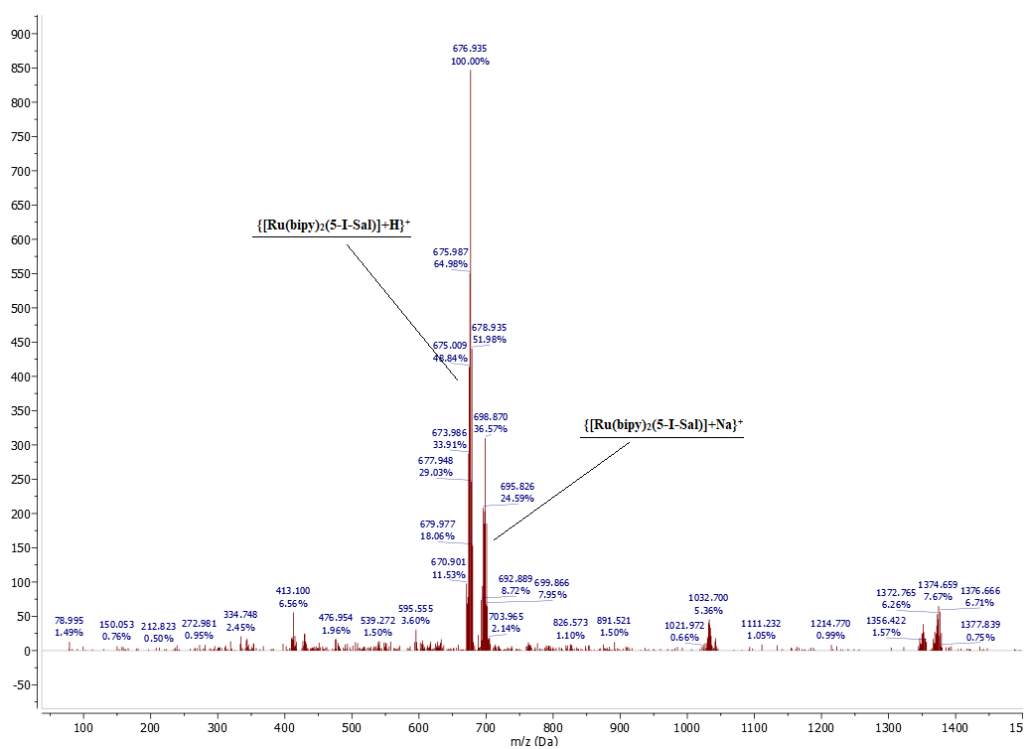

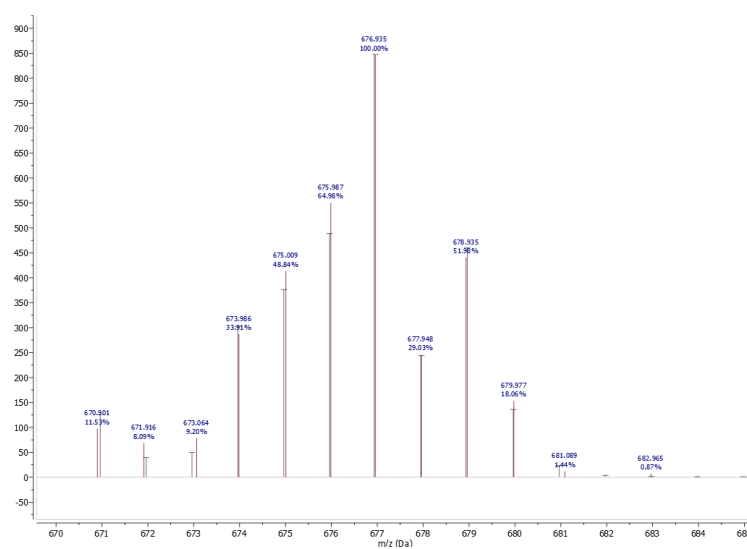

**Figure S25** ESI-MS spectrum of complex [Ru(bipy)<sub>2</sub>(5-I-Sal)] (**8**) together with the assignment of the most significant peaks. Below is a comparison of the simulated and measured isotope pattern for the molecular peak.

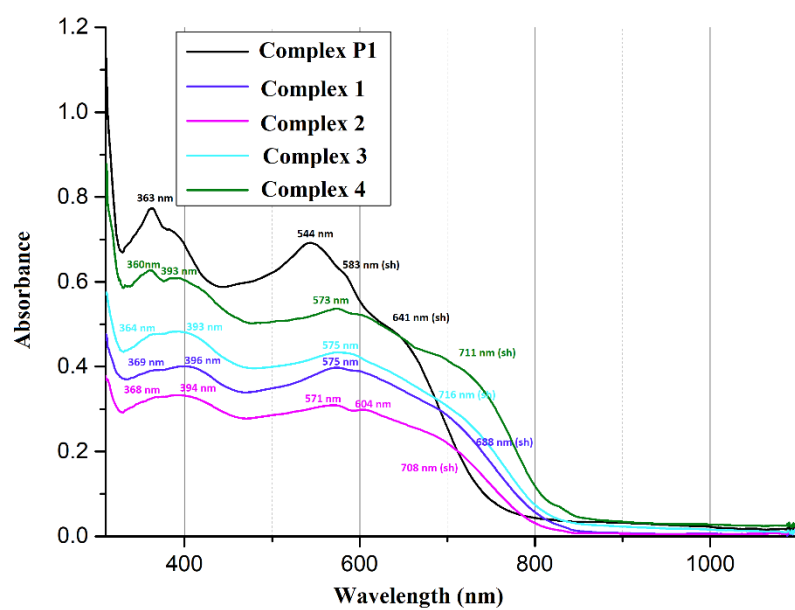

**Figure S26** UV-Vis spectra of complexes **1** – **4** measured in solid state as nujol suspension.



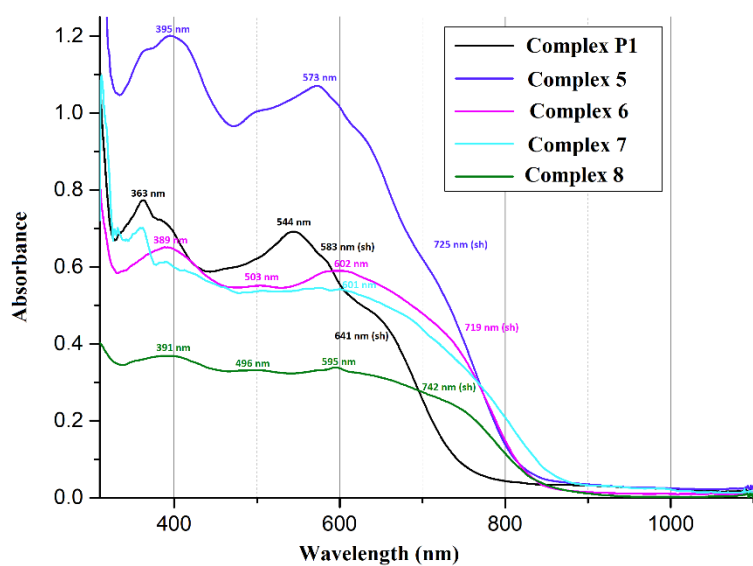

**Figure S27** UV-Vis spectra of complexes 5 – 8 measured in solid state as nujol suspension.

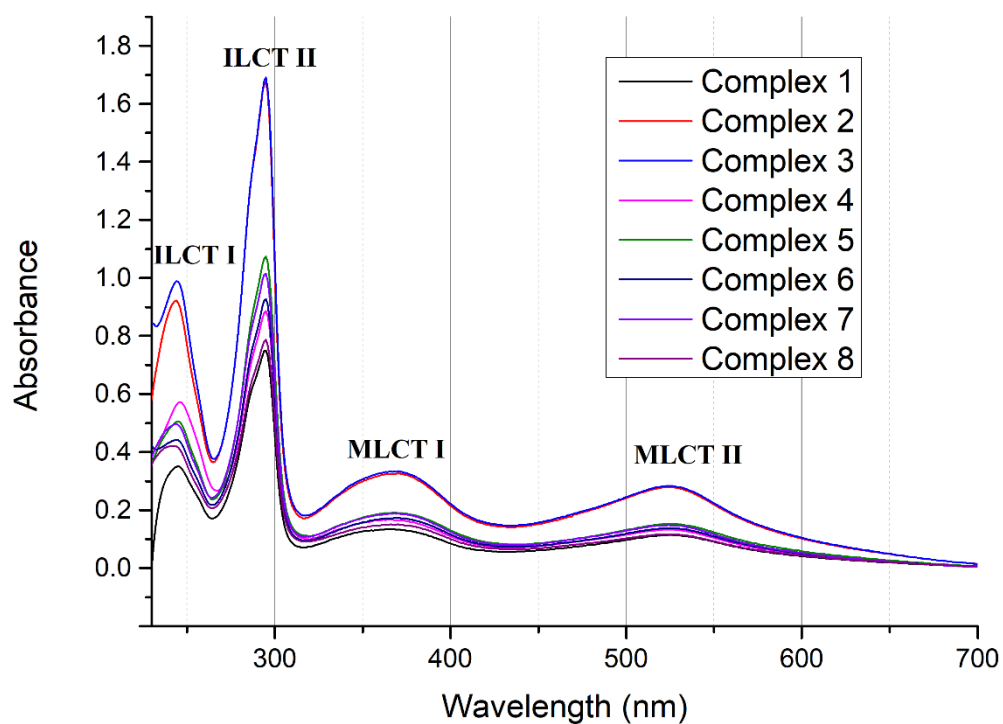

**Figure S28** UV-Vis spectra of complexes 1 – 8 measured in solutions.

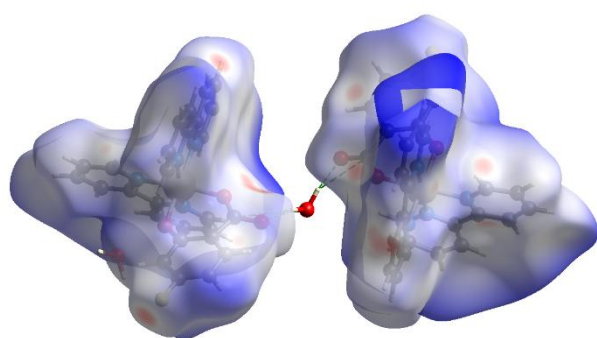

(A)

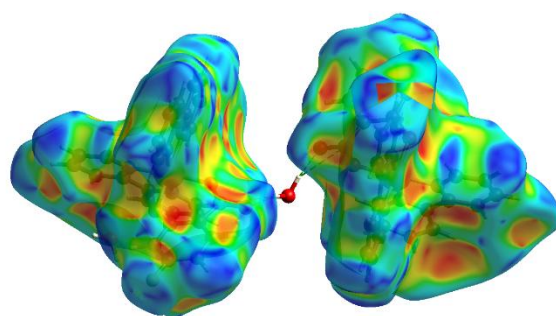

(B)

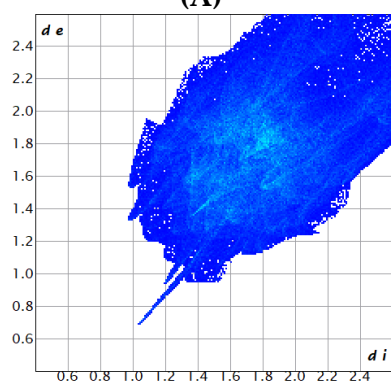

(C)

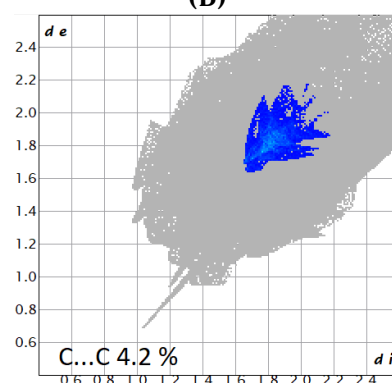

(D)

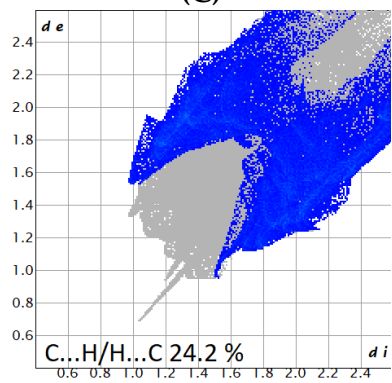

(E)

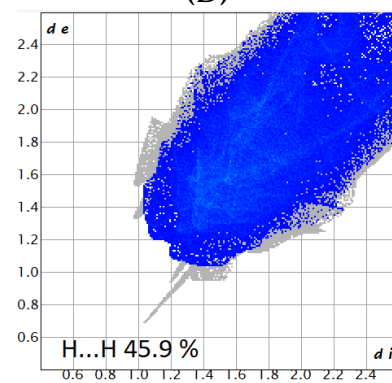

(F)

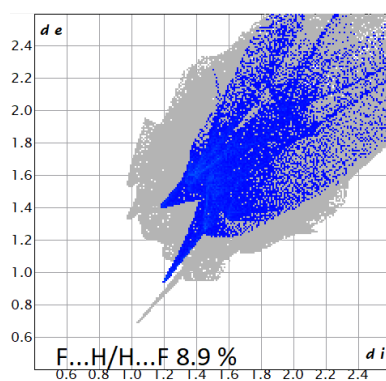

(G)

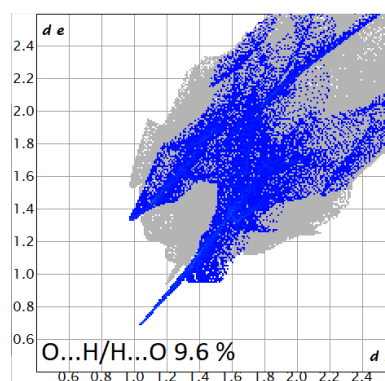

(H)

**Figure S29** Hirshfeld surface mapped over  $d_{norm}$  (A) and shape index (B) for complex  $[\text{Ru}(\text{bipy})_2(4\text{-F-Sal})]\cdot 3\text{H}_2\text{O}\cdot \text{EtOH}$  (1·3H2O·EtOH) together with corresponding overall fingerprint plot (C) and plots by close contacts types: C...C (D); C...H/H...C (E); H...H (F); F...H/H...F (G) and O...H/H...O (H).

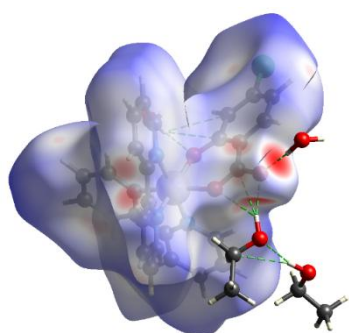

(A)

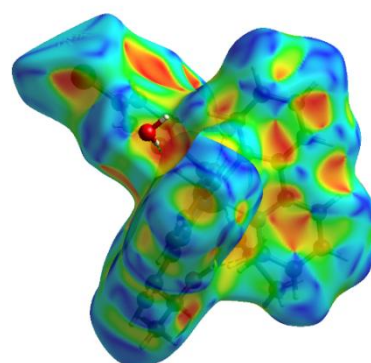

(B)

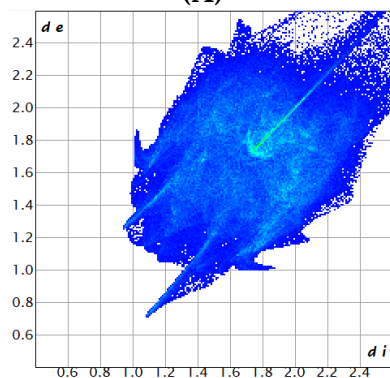

(C)

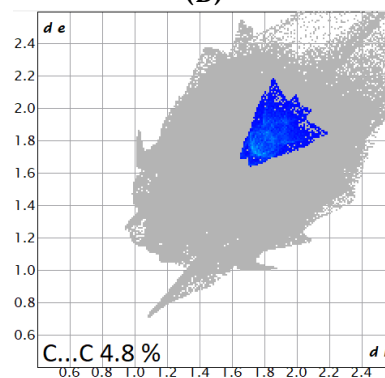

(D)

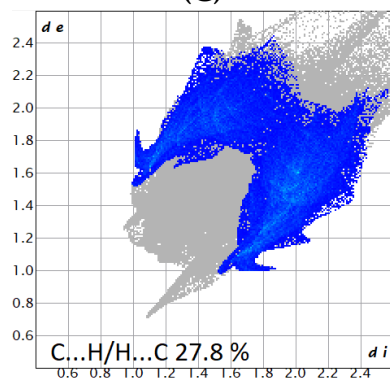

(E)

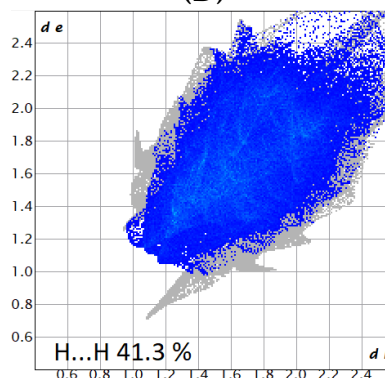

(F)

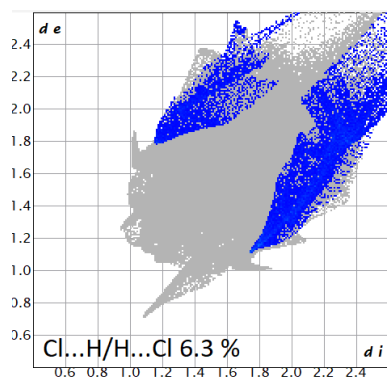

(G)

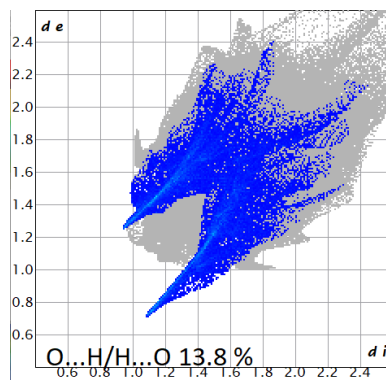

(H)

**Figure S30** Hirshfeld surface mapped over  $d_{norm}$  (A) and shape index (B) for complex  $[Ru(bipy)_2(4-Cl-Sal)] \cdot 2.6H_2O \cdot 2EtOH$  (2·2.6H2O·2EtOH) together with corresponding overall fingerprint plot (C) and plots by close contacts types: C...C (D); C...H/H...C (E); H...H (F); Cl...H/H...Cl (G) and O...H/H...O (H).

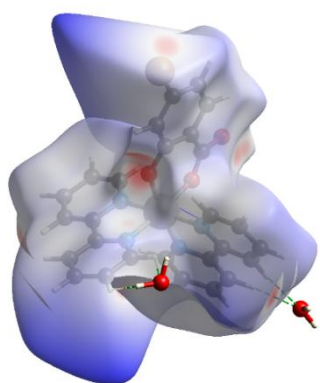

(A)

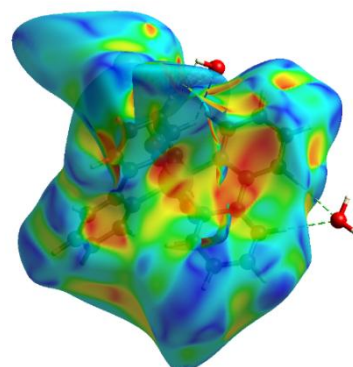

(B)

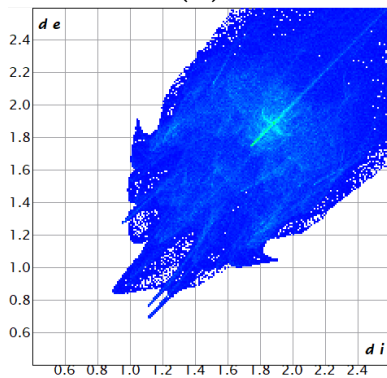

(C)

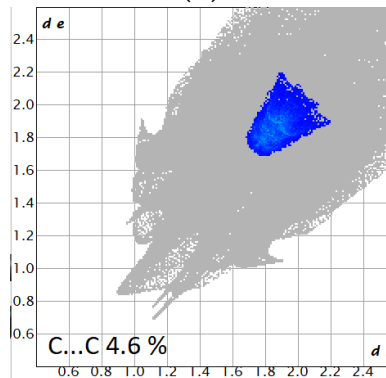

(D)

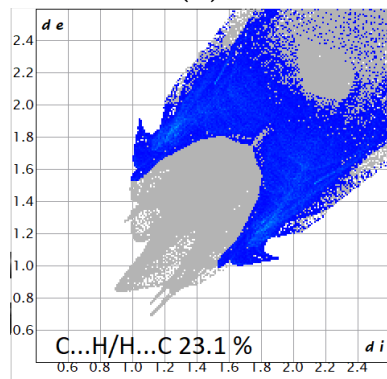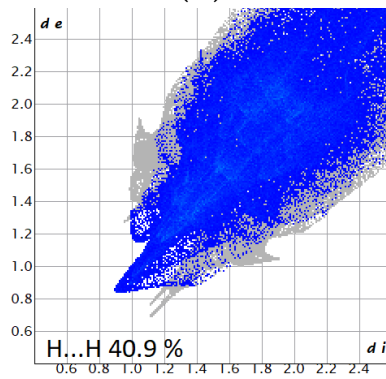

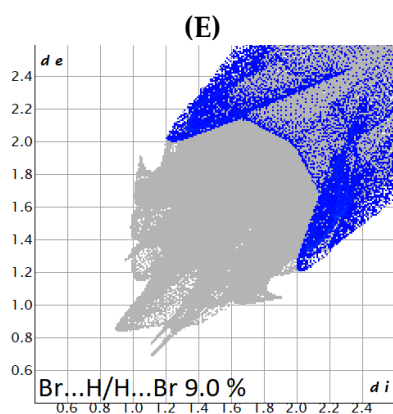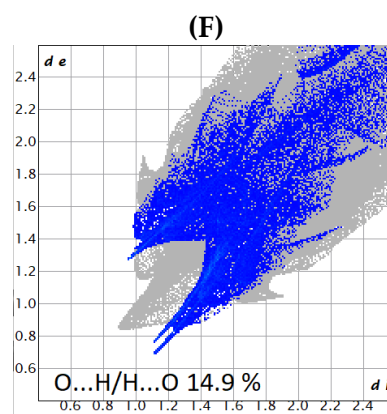

**Figure S31** Hirshfeld surface mapped over  $d_{norm}$  (A) and shape index (B) for complex  $[\text{Ru}(\text{bipy})_2(4\text{-Br-Sal})]\cdot 6\text{H}_2\text{O}$  (**3**·6H<sub>2</sub>O) together with corresponding overall fingerprint plot (C) and plots by close contacts types: C...C (D); C...H/H...C (E); H...H (F); Br...H/H...Br (G) and O...H/H...O (H).

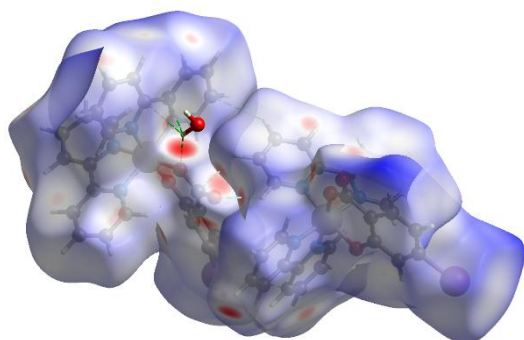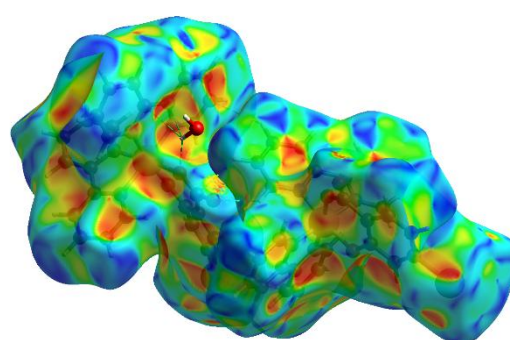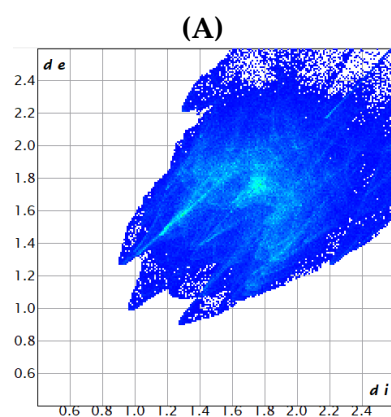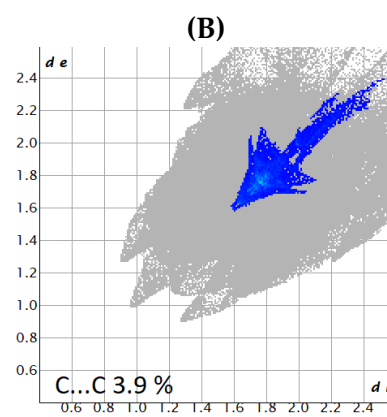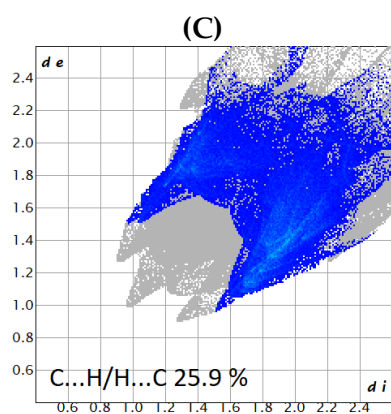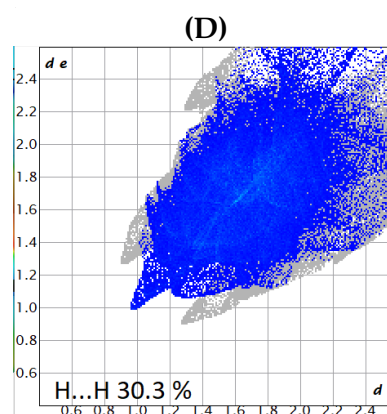



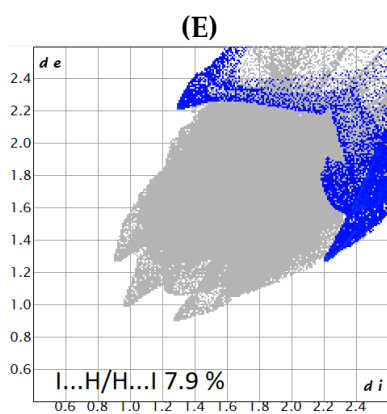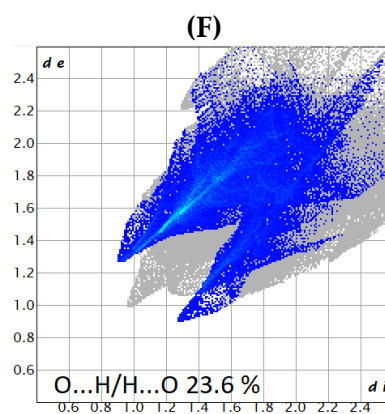

**Figure S32** Hirshfeld surface mapped over  $d_{norm}$  (A) and shape index (B) for complex  $[Ru(bipy)_2(4\text{-I-Sal})] \cdot 3H_2O$  ( $4 \cdot 3H_2O$ ) together with corresponding overall fingerprint plot (C) and plots by close contacts types: C...C (D); C...H/H...C (E); H...H (F); I...H/H...I (G) and O...H/H...O (H).

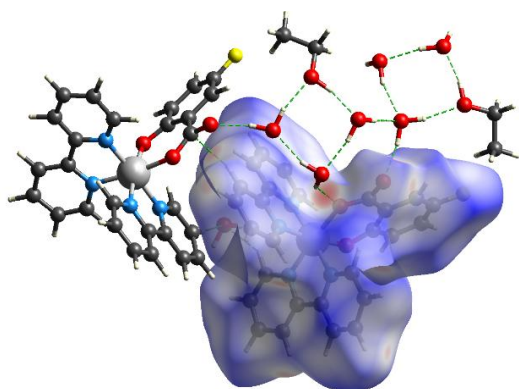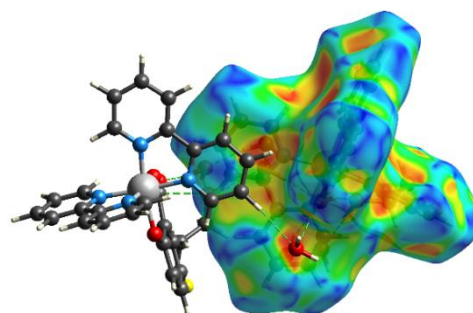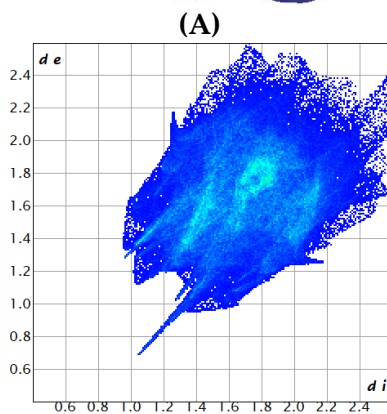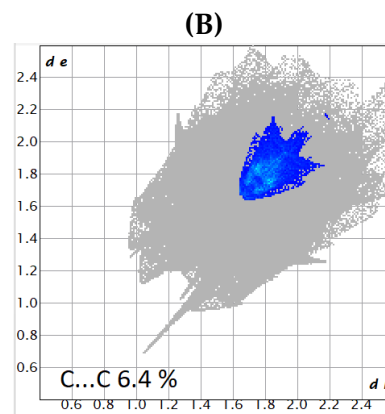

(C)

(D)

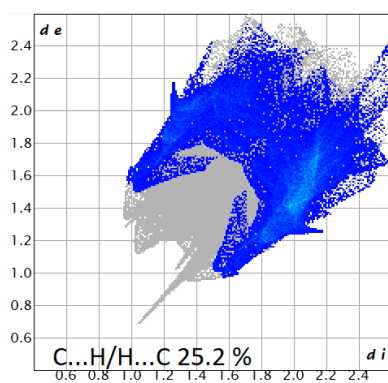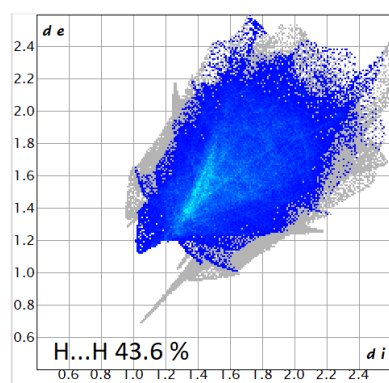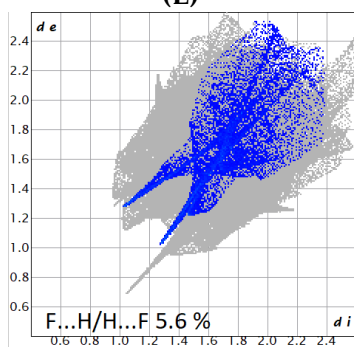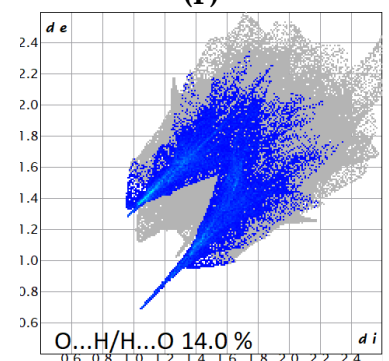

**Figure S33** Hirshfeld surface mapped over  $d_{norm}$  (A) and shape index (B) for complex  $[\text{Ru}(\text{bipy})_2(5\text{-F-Sal})]\cdot 1.55\text{H}_2\text{O}$  (**5** $\cdot 1.55\text{H}_2\text{O}$ ) together with corresponding overall fingerprint plot (C) and plots by close contacts types: C...C (D); C...H/H...C (E); H...H (F); F...H/H...F (G) and O...H/H...O (H).

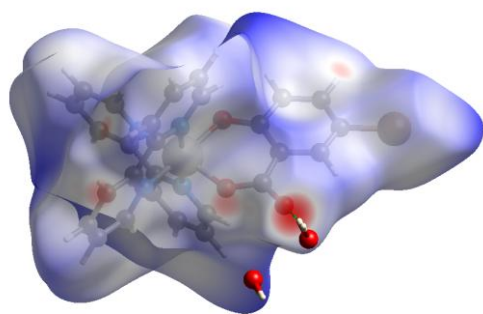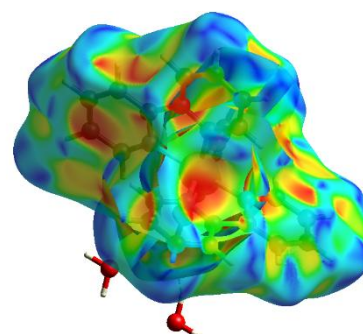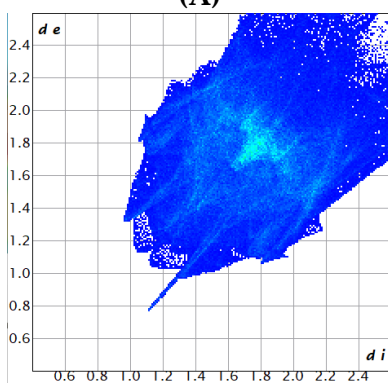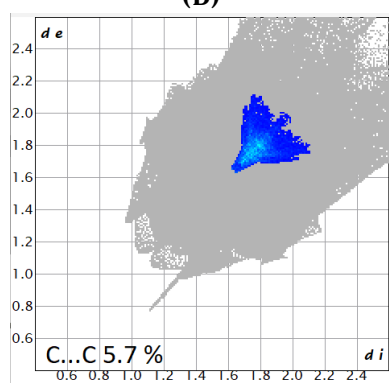

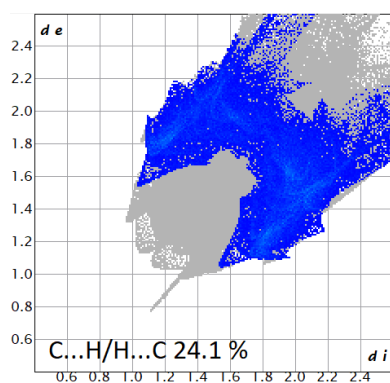

(E)

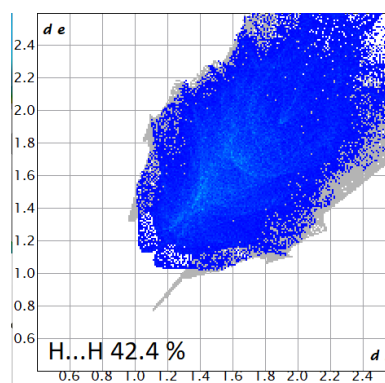

(F)

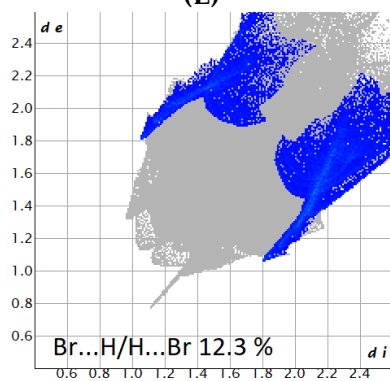

(G)

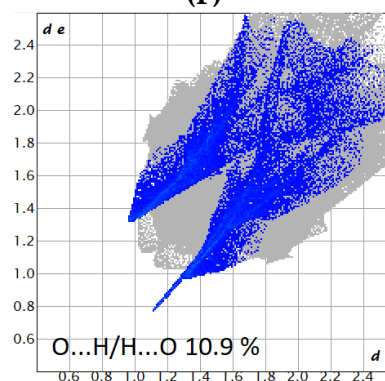

(H)

**Figure S34** Hirshfeld surface mapped over  $d_{norm}$  (A) and shape index (B) for complex  $[\text{Ru}(\text{bipy})_2(5\text{-Br-Sal})]\cdot 1.75\text{H}_2\text{O}$  ( $7\cdot 1.75\text{H}_2\text{O}$ ) together with corresponding overall fingerprint plot (C) and plots by close contacts types: C...C (D); C...H/H...C (E); H...H (F); Br...H/H...Br (G) and O...H/H...O (H).

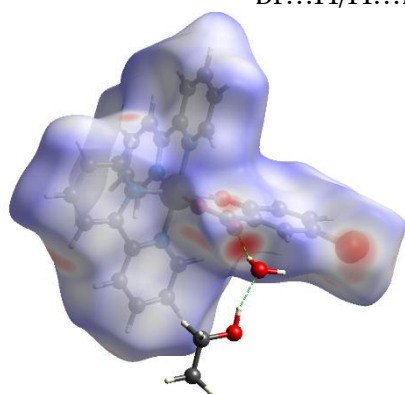

(A)

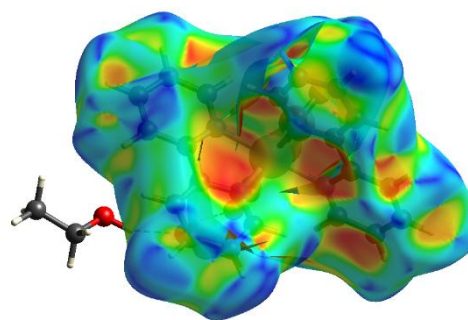

(B)

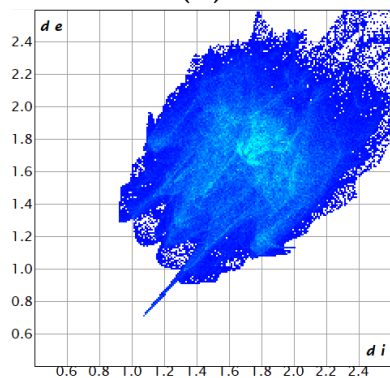

(C)

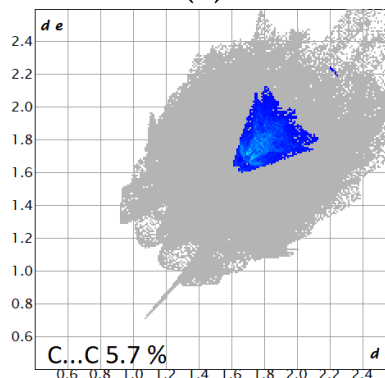

(D)



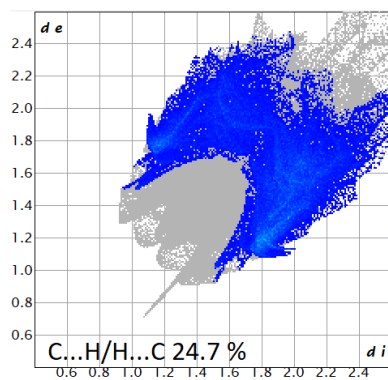

(E)

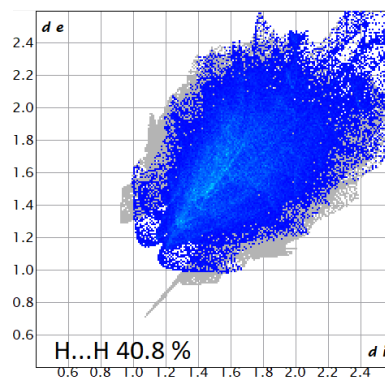

(F)

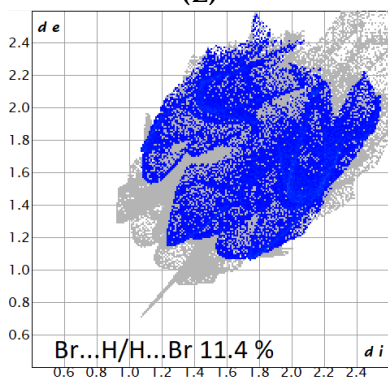

(G)

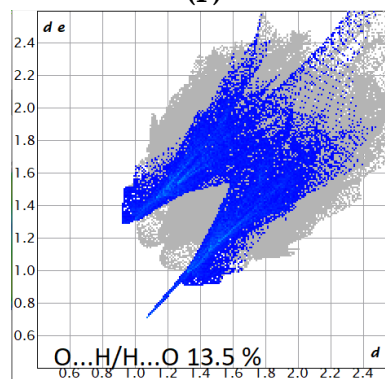

(H)

**Figure S35** Hirshfeld surface mapped over  $d_{\text{norm}}$  (A) and shape index (B) for complex  $[\text{Ru}(\text{bipy})_2(5\text{-Br-Sal})]\cdot\text{H}_2\text{O}\cdot\text{EtOH}$  (7·H<sub>2</sub>O·EtOH) together with corresponding overall fingerprint plot (C) and plots by close contacts types: C...C (D); C...H/H...C (E); H...H (F); Br...H/H...Br (G) and O...H/H...O (H).

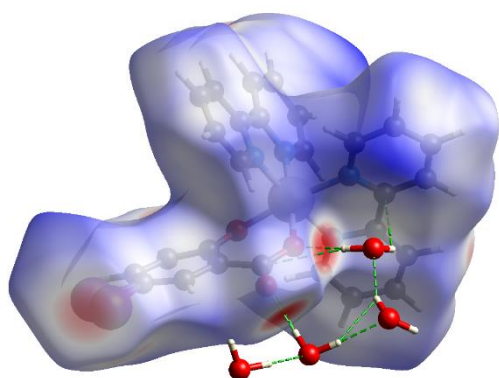

(A)

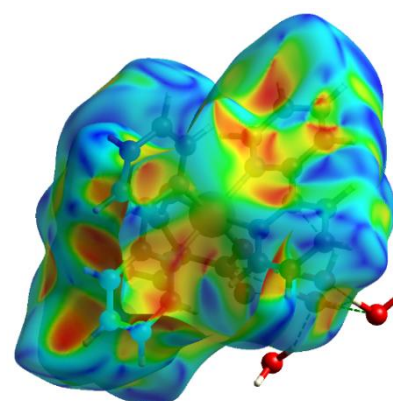

(B)

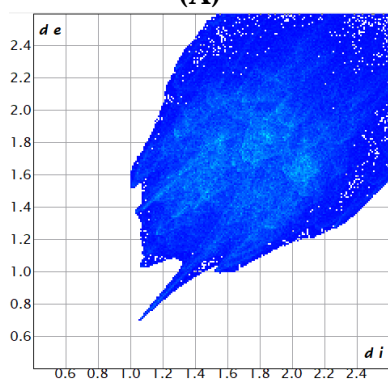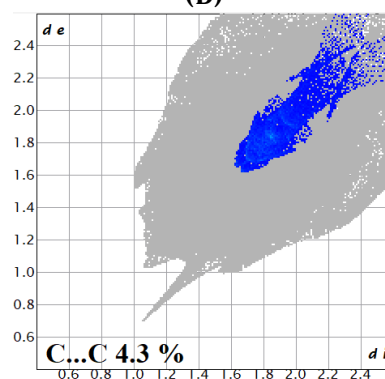

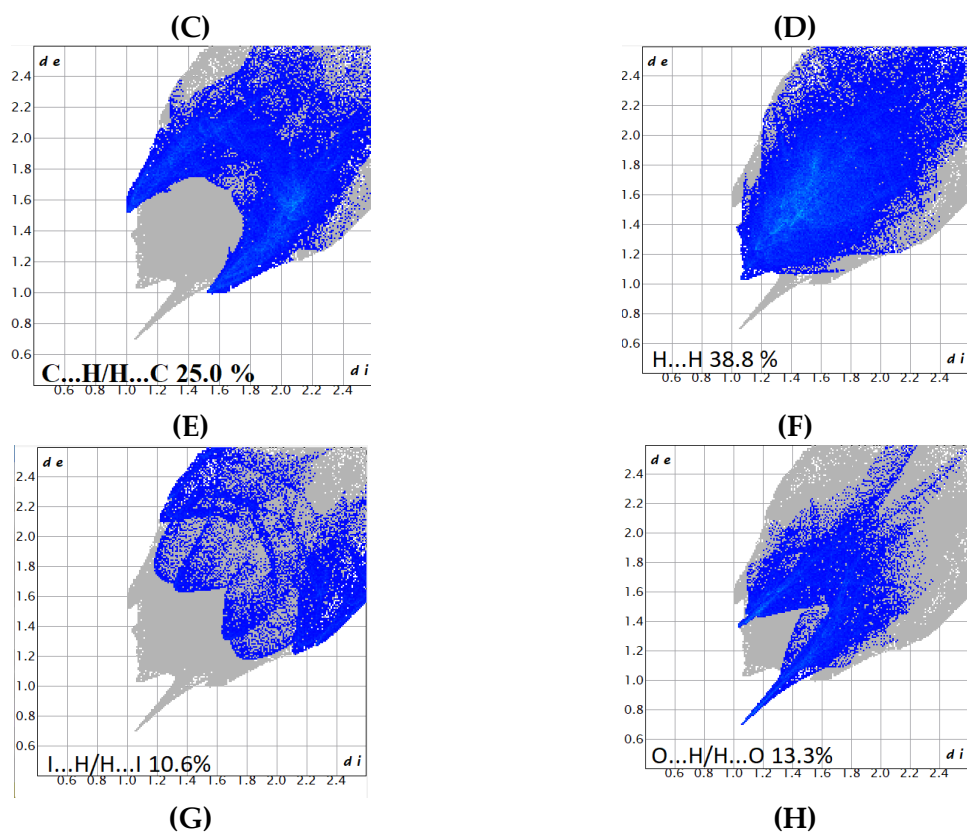

**Figure S36** Hirshfeld surface mapped over  $d_{\text{norm}}$  (A) and shape index (B) for complex  $[\text{Ru}(\text{bipy})_2(5\text{-I-Sal})]\cdot 4\text{H}_2\text{O}$  ( $8\cdot 4\text{H}_2\text{O}$ ) together with corresponding overall fingerprint plot (C) and plots by close contacts types:  $\text{C}\cdots\text{C}$  (D);  $\text{C}\cdots\text{H}/\text{H}\cdots\text{C}$  (E);  $\text{H}\cdots\text{H}$  (F);  $\text{I}\cdots\text{H}/\text{H}\cdots\text{I}$  (G) and  $\text{O}\cdots\text{H}/\text{H}\cdots\text{O}$  (H).

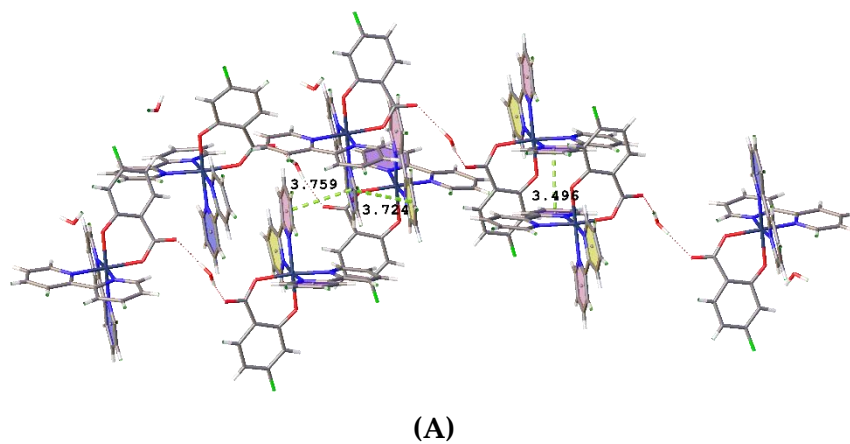

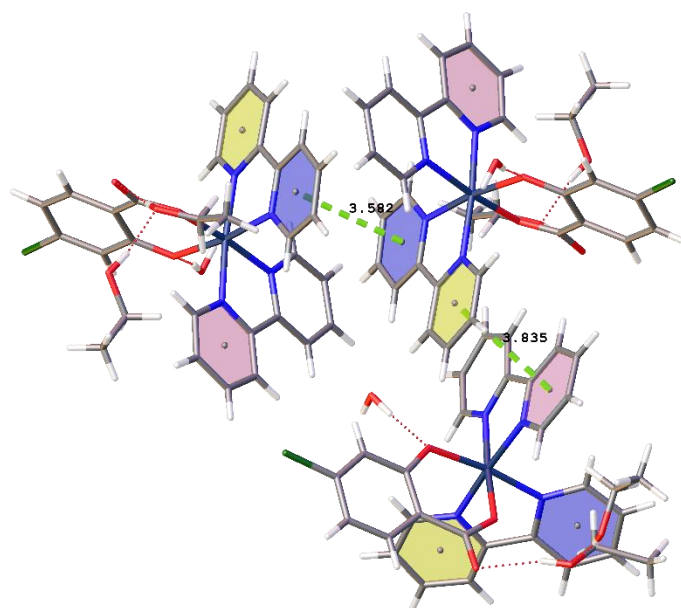

(B)

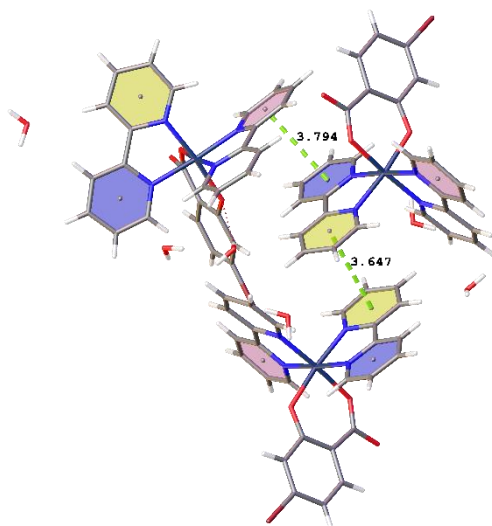

(C)

**Figure S37**  $\pi\cdots\pi$  stacking interactions for complex 1·3H<sub>2</sub>O·EtOH (A), 2·2.6H<sub>2</sub>O·2EtOH (B) and 3·6H<sub>2</sub>O (C).

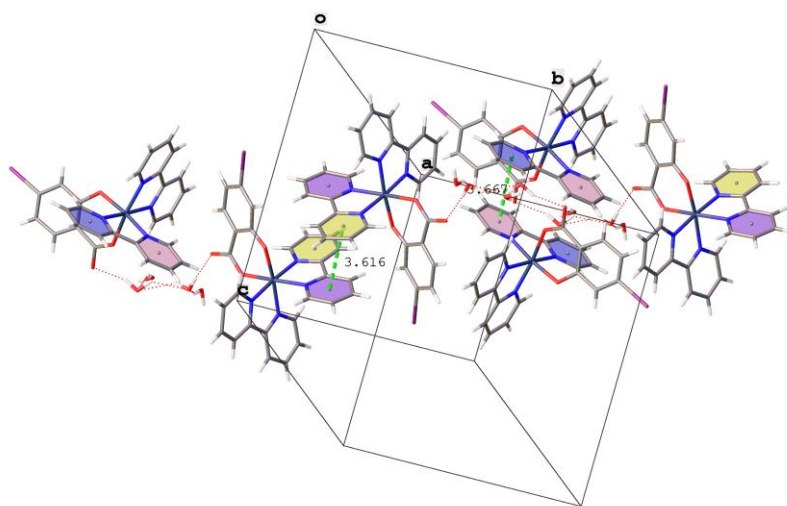

(A)

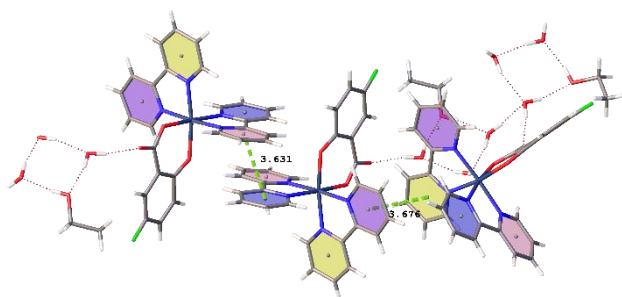

(B)

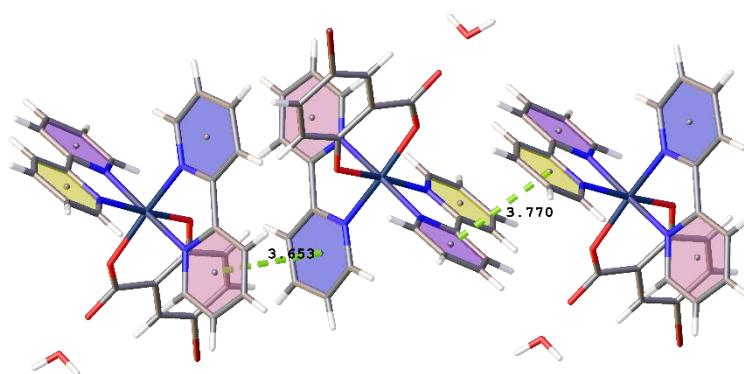

(C)

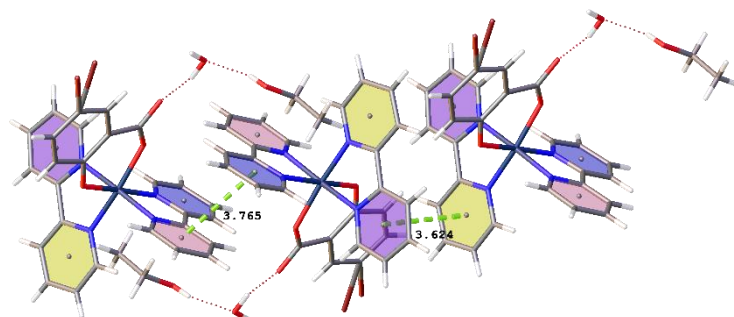

(D)

**Figure S38**  $\pi\cdots\pi$  stacking interactions for complex  $4\cdot 3\text{H}_2\text{O}$  (A),  $5\cdot 1.55\text{H}_2\text{O}$  (B),  $7\cdot 1.75\text{H}_2\text{O}$  (C) and  $7\cdot 4\text{H}_2\text{O}$  (D).

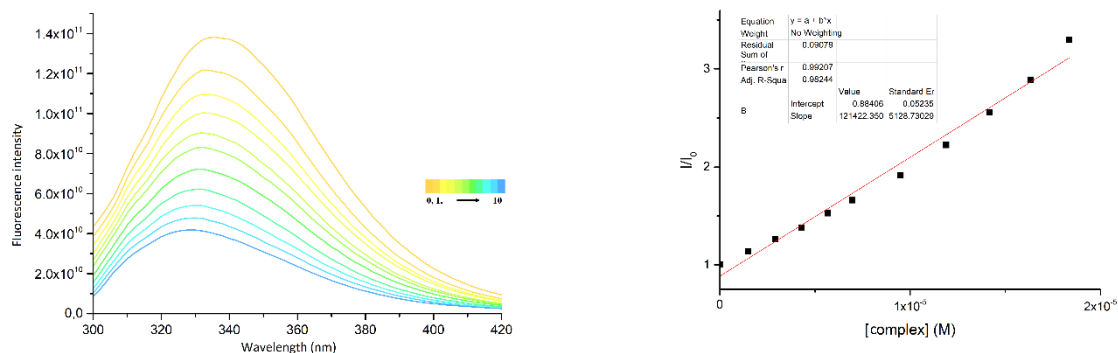

**Figure S39** (A) Changes in fluorescence spectra of BSA upon complex 1 concentration rising, (B) graphical dependence of relative BSA fluorescence emission intensity ( $I/I_0$ ) vs. concentration ratio [complex] .

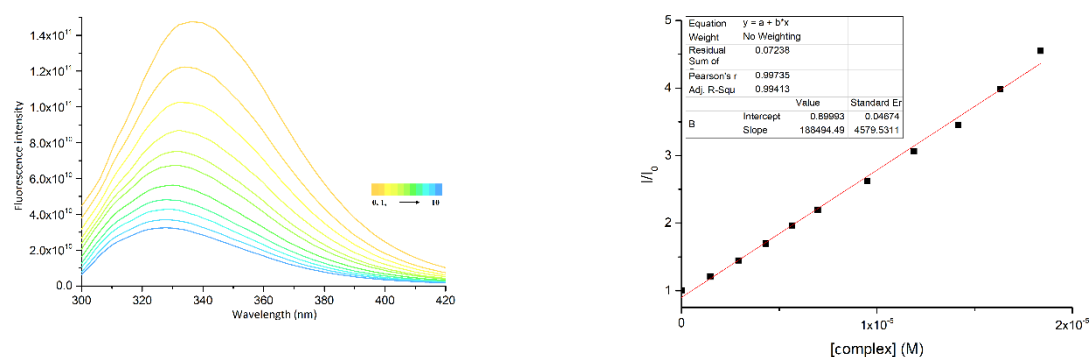

**Figure S40** (A) Changes in fluorescence spectra of BSA upon complex 2 concentration rising, (B) graphical dependence of relative BSA fluorescence emission intensity ( $I/I_0$ ) vs. concentration ratio [complex] .

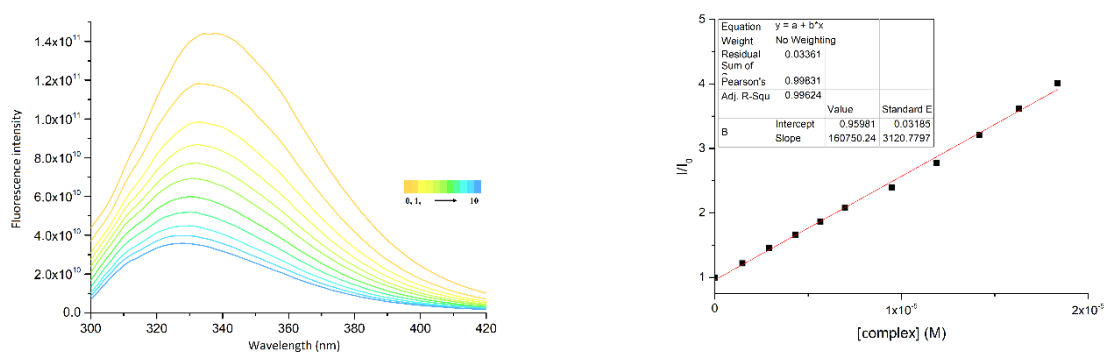

**Figure S41** (A) Changes in fluorescence spectra of BSA upon complex 3 concentration rising, (B) graphical dependence of relative BSA fluorescence emission intensity ( $I/I_0$ ) vs. concentration ratio [complex] .

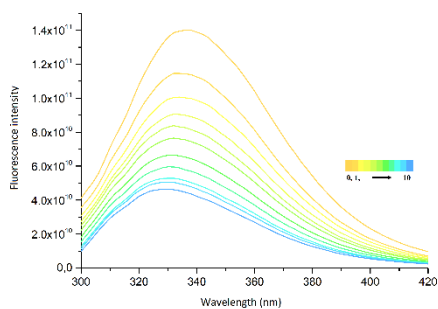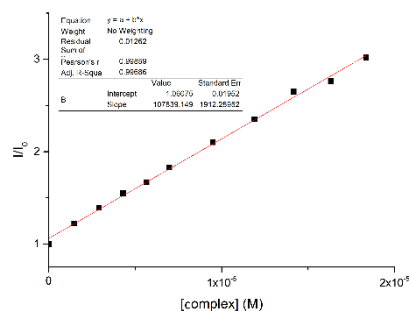

**Figure S42** (A) Changes in fluorescence spectra of BSA upon complex **4** concentration rising, (B) graphical dependence of relative BSA fluorescence emission intensity ( $I/I_0$ ) vs. concentration ratio [complex] .

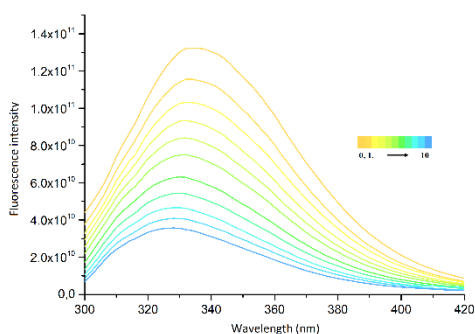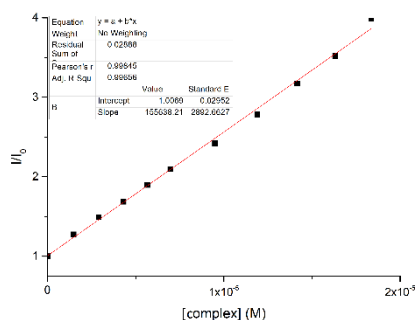

**Figure S43** (A) Changes in fluorescence spectra of BSA upon complex **5** concentration rising, (B) graphical dependence of relative BSA fluorescence emission intensity ( $I/I_0$ ) vs. concentration ratio [complex] .

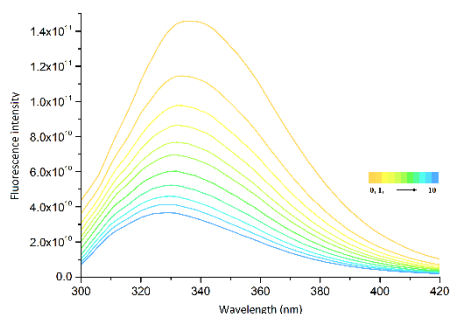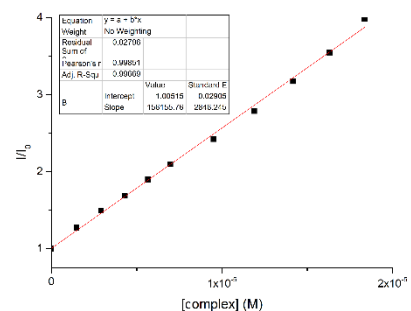

**Figure S44** (A) Changes in fluorescence spectra of BSA upon complex **6** concentration rising, (B) graphical dependence of relative BSA fluorescence emission intensity ( $I/I_0$ ) vs. concentration ratio [complex] .

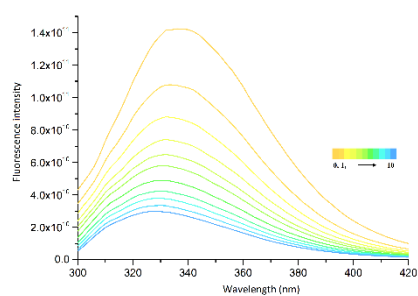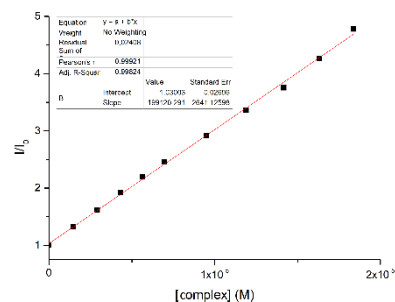

**Figure S45** (A) Changes in fluorescence spectra of BSA upon complex 7 concentration rising, (B) graphical dependence of relative BSA fluorescence emission intensity ( $I/I_0$ ) vs. concentration ratio [complex] .

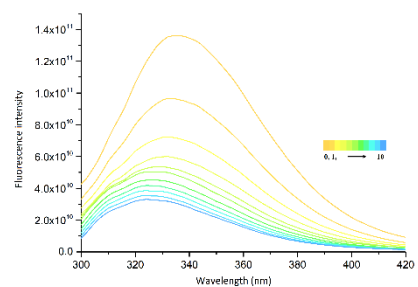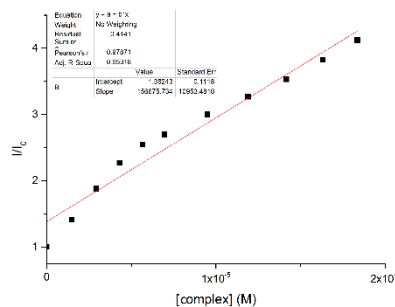

**Figure S46** (A) Changes in fluorescence spectra of BSA upon complex 8 concentration rising, (B) graphical dependence of relative BSA fluorescence emission intensity ( $I/I_0$ ) vs. concentration ratio [complex] .

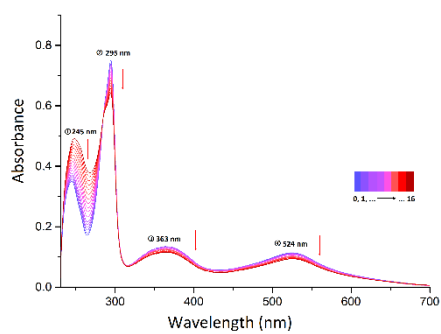

(A)

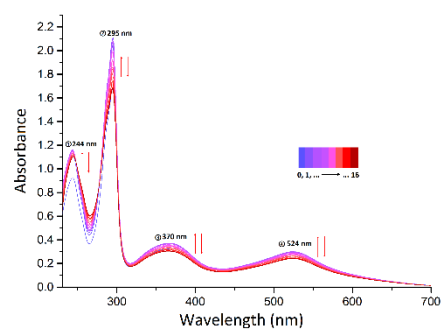

(B)

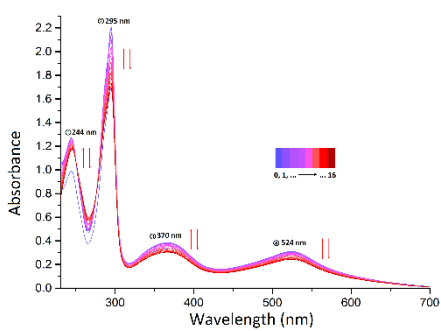

(C)

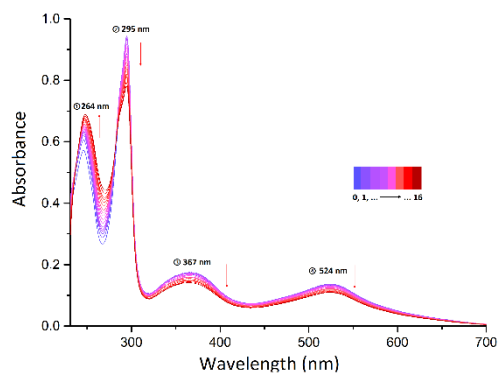

(D)

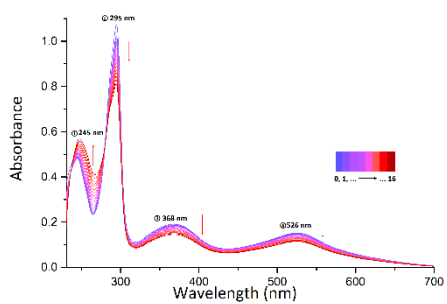

(E)

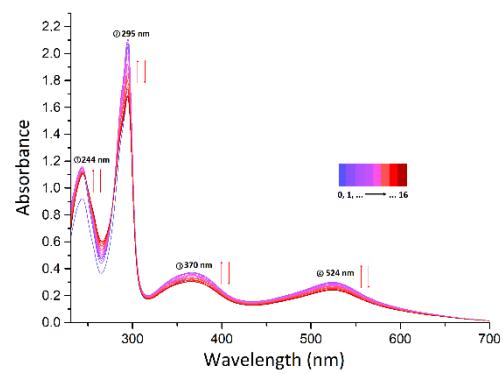

(F)



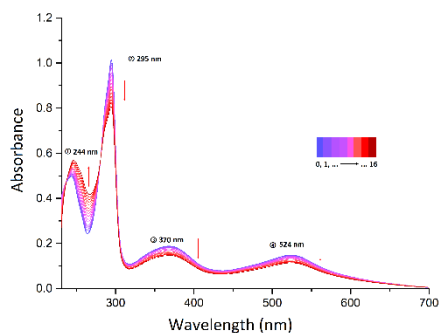

(G)

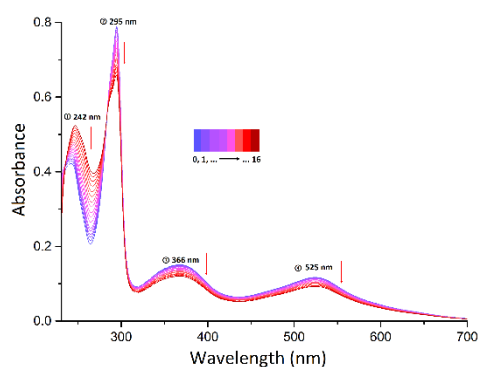

(H)

**Figure S47** Changes in the electron spectra of complexes upon addition of ct-DNA solution for complex 1 (A), 2 (B), 3 (C), 4 (D), 5 (E), 6 (F), 7 (G), 8 (H).

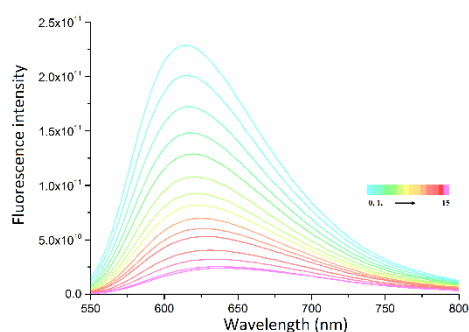

(A)

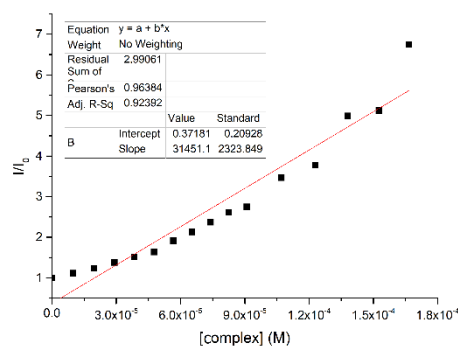

(B)

**Figure S48** (A) Changes in fluorescence spectra of EB-DNA upon complex 1 concentration rising, (B) graphical dependence of relative EB-DNA fluorescence emission intensity ( $I/I_0$ ) vs. concentration ratio [complex] .

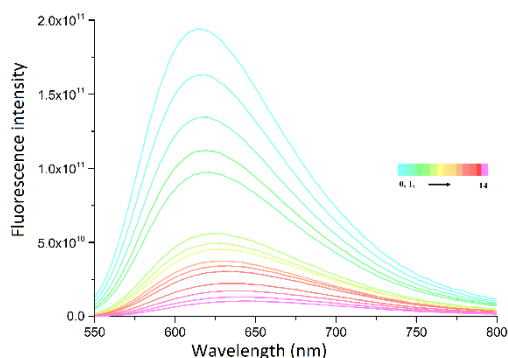

(A)

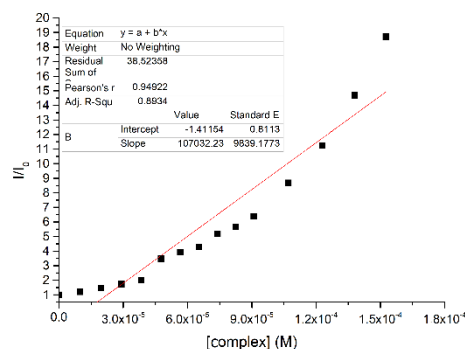

(B)

**Figure S49** (A) Changes in fluorescence spectra of EB-DNA upon complex 2 concentration rising, (B) graphical dependence of relative EB-DNA fluorescence emission intensity ( $I/I_0$ ) vs. concentration ratio [complex] .

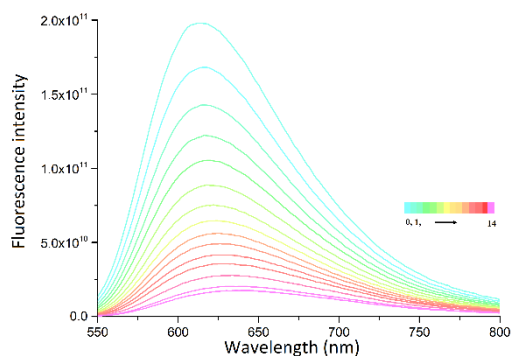

(A)

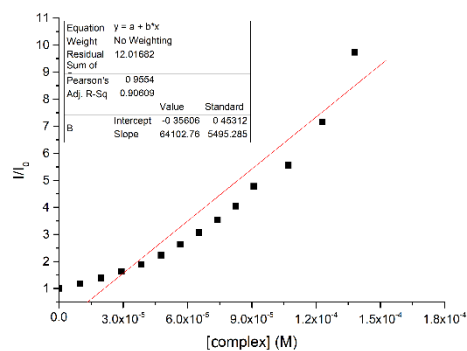

(B)

**Figure S50** (A) Changes in fluorescence spectra of EB-DNA upon complex 4 concentration rising, (B) graphical dependence of relative EB-DNA fluorescence emission intensity ( $I/I_0$ ) vs. concentration ratio [complex] .

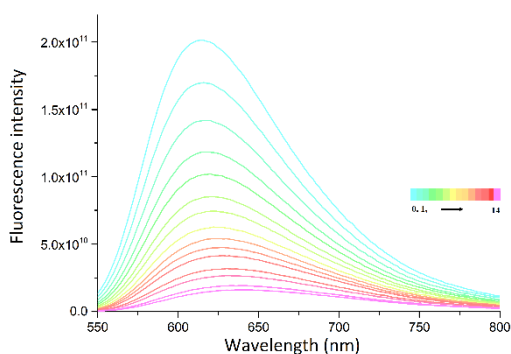

(A)

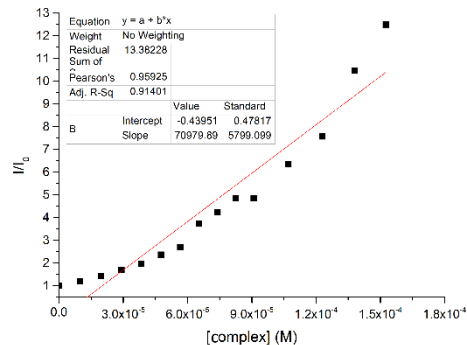

(B)

**Figure S51** (A) Changes in fluorescence spectra of EB-DNA upon complex 5 concentration rising, (B) graphical dependence of relative EB-DNA fluorescence emission intensity ( $I/I_0$ ) vs. concentration ratio [complex] .

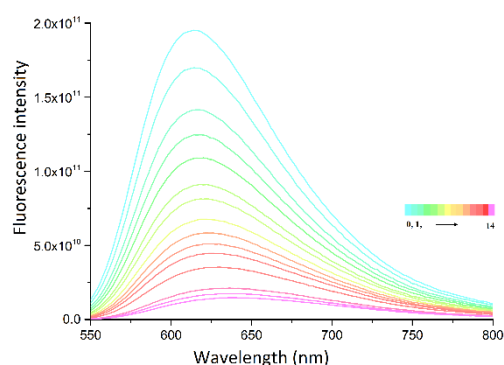

(A)

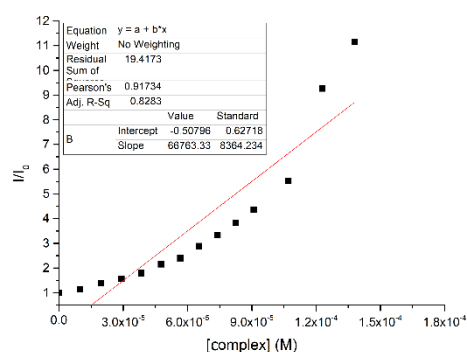

(B)

**Figure S52** (A) Changes in fluorescence spectra of EB-DNA upon complex 6 concentration rising, (B) graphical dependence of relative EB-DNA fluorescence emission intensity ( $I/I_0$ ) vs. concentration ratio [complex] .

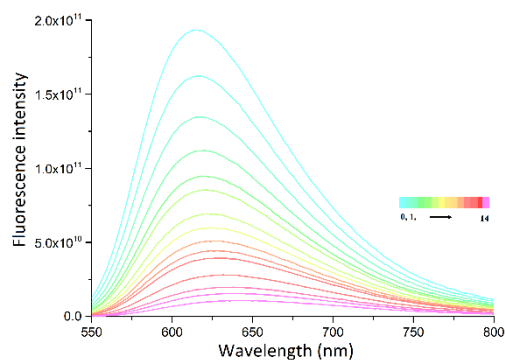

(A)

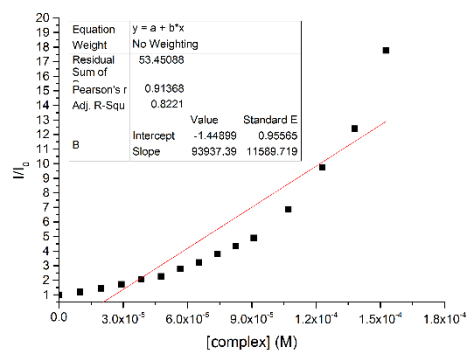

(B)

**Figure S53** (A) Changes in fluorescence spectra of EB-DNA upon complex 7 concentration rising, (B) graphical dependence of relative EB-DNA fluorescence emission intensity ( $I/I_0$ ) vs. concentration ratio [complex] .

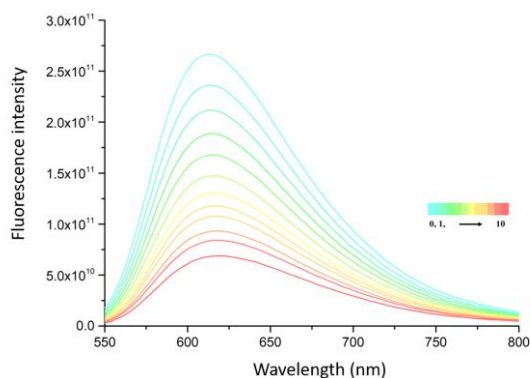

(A)

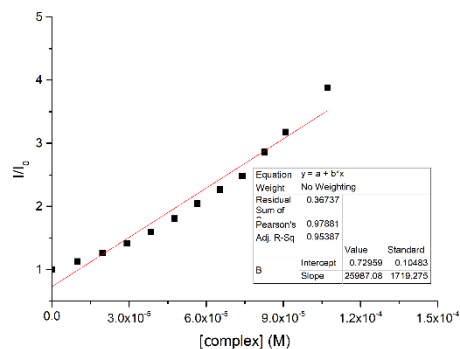

(B)

**Figure S54** (A) Changes in fluorescence spectra of EB-DNA upon complex 8 concentration rising, (B) graphical dependence of relative EB-DNA fluorescence emission intensity ( $I/I_0$ ) vs. concentration ratio [complex].
